# Supplementary material for: Characterizing the marine mammal exposome by iceberg modeling, linking chemical analysis and in vitro bioassays
Source: Environ Sci Process Impacts. 2023 May 3;25(11):1802–16. doi: 10.1039/d3em00033h (PMC10647987; doi:10.1039/d3em00033h)
Supplement: EM-025-D3EM00033H-s002 [file EM-025-D3EM00033H-s002.xlsx]

## Sheet: Table of Contents
	Electronic Supplementary Information
	Characterizing the marine mammal exposome by iceberg modeling, linking chemical analysis and in vitro bioassays
	Eva B. Reitera, Beate I. Escherb,c, Elisa Rojo-Nietoa, Hannah Noltea,d, Ursula Sieberte and Annika Jahnkea,d
	a Department of Ecological Chemistry, Helmholtz Centre for Environmental Research - UFZ, Permoserstr. 15, 04318 Leipzig, Germany
	b Department of Cell Toxicology, Helmholtz Centre for Environmental Research - UFZ, Permoserstr. 15, 04318 Leipzig, Germany
	c Environmental Toxicology, Department of Geosciences, Eberhard Karls University Tübingen, Schnarrenbergstr. 94-96, 72076 Tübingen, Germany
	d Institute for Environmental Research, RWTH Aachen University, 52074 Aachen, Germany
	e Institute for Terrestrial and Aquatic Wildlife Research, University of Veterinary Medicine Hannover, Foundation, Werftstr. 6, 25761, Büsum, Germany
	Table of contents:
	Table S1. Further information on the twelve individuals analyzed.
	Table S2. Details related to the marine mammal organs and PES.
	Table S3. List of target chemicals, their compound categories, CAS number, chemical formula and the respective internal standards used for quantification.
	Table S4. Chemicals detected in this study, their MDL (Method Detection Limits) and their physiochemical properties and the cytotoxicity (IC10) and effect concentrations (EC10) in the bioassays.
	Table S5. Analytical results of the PDMS extracts in cPDMS (pganalyte/mgPDMS).
	Table S6. Analytical results of selected compounds of the solvent extracted blubber samples in clipid (pganalyte/mglipid).
	Table S7. Converted concentrations in PDMS to lipid-associated concentrations in clipid,eq. (pganalyte/mglipid).
	Table S8. Iceberg modeling of effect in the AhR-CALUX, AREc32 and PPARγ-bla and cytotoxicity in the AhR-CALUX assay.

## Sheet: Table S1
Table S1. Further information on the twelve individuals analyzed: code (P.p.: harbor porpoise, P.v.: common seal, P.h.: ringed seal, O.o.: orca, plus running number), analyzed organs (2: core set of liver and blubber; 4: full set of liver, blubber, brain and kidney), sex, age group, standing year, waters and location found. A map of the locations is given in Figure 1 (main manuscript). For some o…
code	Organs availabe	sex	age group	stranding year	waters	location found	previous studies
P.p. 1	2	female	juvenile	2018	North Sea	Island Sylt	Reiter et al.1
P.p. 2	2	male	juvenile	2019	North Sea	Island Amrum	Reiter et al.1
P.p. 3	4	female	adult	2019	Baltic Sea	Lübeck Bay	Reiter et al.1
P.p. 4	4	female	juvenile	2019	Baltic Sea	Eckernförde Bay	Reiter et al.1
P.p. 5	4	female	adult	2018	Baltic Sea	Fehmarn	Reiter et al.1
P.p. 6	4	male	juvenile	2019	North Sea	Island Amrum	-
P.p. 7	2	male	neonate	2019	Baltic Sea	Eckernförde Bay	-
P.v. 1	4	female	adult	2018	North Sea	Island Amrum	Reiter et al.1
P.v. 2	4	male	neonate	2019	North Sea	Eiderstedt	-
P.v. 3	4	male	neonate	2019	North Sea	Eiderstedt	-
P.h. 1	2	male	neonate	2018	Baltic Sea	Eckernförde Bay	-
O.o. 1	4	male	neonate	2016	North Sea	Island Sylt	Reiter et al.1, Reckendorf et al.2, Schnitzler et al.3
1 E. B. Reiter, B. I. Escher, U. Siebert and A. Jahnke, Activation of the xenobiotic metabolism and oxidative stress response by mixtures of organic pollutants extracted with in-tissue passive sampling from liver, kidney, brain and blubber of marine mammals, Environ Int, 2022, 165, 107337.
2 A. Reckendorf, E. Ludes-Wehrmeister, P. Wohlsein, R. Tiedemann, U. Siebert and K. Lehnert, First record of Halocercus sp. (Pseudaliidae) lungworm infections in two stranded neonatal orcas (Orcinus orca), Parasitology, 2018, 145, 1553-1557.
3 J. G. Schnitzler, A. Reckendorf, M. Pinzone, M. Autenrieth, R. Tiedemann, A. Covaci, G. Malarvannan, A. Ruser, K. Das and U. Siebert, Supporting evidence for PCB pollution threatening global killer whale population, Aquat Toxicol, 2019, 206, 102-104.

## Sheet: Table S2
Table S2. Details related to the marine mammal organs and PES. Information includes the homogenization tool, lipid content of the analyzed tissues, the PDMS used for analytical measurements, including the dimension and weights of PDMS (recorded before sampling), the number of relocations perfomed during and the the total time of the dynamic sampling method. After the eqilibration of PDMS with the…
individual	organ	blender type for homogenization	lipid content ± SD [%]	silicone tickness [µm]	approximate silicone dimensions [mm x mm]	silicone weight [mg]	number of relocations	exposure time [h]	Mean weight gain to PDMS ± SD [%]
Harbor Porpoise 1 (P.p. 1)	Liver	Büchi	7.13 ± 0.19 (n=2)	350	300 x 300	298.8	64	216	1.0 ± 0.061
				350	300 x 300	310.9	64	216
				250	300 x 300	215.7	37	216
				250	300 x 300	214.8	39	216
				125	300 x 300	162.2	48	216
				125	300 x 300	164.1	48	216
	Blubber	Büchi	79.3 ± 5.3 (n=2)	350	175 x 175	130.7	0	48	1.9 ± 0.013
				350	175 x 175	119.4	0	48
Harbor Porpoise 2 (P.p. 2)	Liver	Büchi	3.75 ± 0.048 (n=2)	350	175 x 175	127	70	216	1.0 ± 0.11
				350	175 x 175	122.8	70	216
				250	120 x 220	90.71	70	216
				250	120 x 220	85.83	70	216
				125	120 x 220	45.56	70	216
	Blubber	Büchi	81.6 ± 0.38 (n=2)	350	175 x 175	130.1	0	48	1.9 ± 0.0040
				350	175 x 175	115.8	0	48
Harbor Porpoise 3 (P.p. 3)	Liver	Büchi	5.11 ± 0.42 (n=3)	350	175 x 175	125.2	70	216	1.0 ± 0.080
				350	175 x 175	129.7	70	216
				250	120 x 220	102.1	70	216
				250	120 x 220	91.49	70	216
				125	120 x 220	56.58	70	216
				125	120 x 220	51.64	70	216
	Blubber	Büchi	86.9 ± 0.30 (n=2)	350	175 x 175	120.2	0	48	3.2 ± 0.0045
				350	175 x 175	116.4	0	48
	Brain	Büchi	10.3 ± 0.16 (n=2)	350	175 x 175	120.5	70	216	0.28 ± 0.015
				350	175 x 175	132.8	70	216
				250	120 x 220	102.7	70	216
				250	120 x 220	89.46	70	216
				125	120 x 220	51.87	70	216
				125	120 x 220	52.78	70	216
	Kidney	Büchi	2.32 ± 0.0044 (n=2)	350	175 x 175	119.8	74	216	0.56 ± 0.10
				250	120 x 220	86.99	74	216
				250	120 x 220	91.17	74	216
				125	120 x 220	44.05	74	216
Harbor Porpoise 4 (P.p. 4)	Liver	Büchi	3.91 ± 0.24 (n=2)	350	175 x 175	132.2	70	216	1.1 ± 0.23
				350	175 x 175	121.3	70	216
				250	120 x 220	99.59	70	216
				250	120 x 220	100.7	70	216
				125	120 x 220	53.63	70	216
				125	120 x 220	49.51	70	216
	Blubber	Büchi	93.9 ± 0.22 (n=2)	350	175 x 175	121.1	0	48	1.2 ± 0.001
				350	175 x 175	115.2	0	48
	Brain	Büchi	7.92 ± 0.013 (n=2)	350	175 x 175	129.1	64	192	0.92 ± 0.049
				350	175 x 175	121.3	64	192
				250	120 x 220	87.72	64	192
				250	120 x 220	88.41	64	192
				125	120 x 220	45.34	64	192
				125	120 x 220	41.98	64	192
	Kidney	Waring lab	2.64 ± 0.060 (n=2)	350	175 x 175	127.4	70	192	0.46 ± 0.0018
				350	175 x 175	120.6	70	192
Harbor Porpoise 5 (P.p. 5)	Liver	Büchi	5.44 ± 0.22 (n=2)	350	175 x 175	132.7	70	216	1.0 ± 0.024
				350	175 x 175	119.4	70	216
				250	120 x 220	101.5	70	216
				250	120 x 220	102.9	70	216
				125	120 x 220	51.18	70	216
				125	120 x 220	48.69	70	216
	Blubber	Büchi	97.4 ± 0.26 (n=2)	350	175 x 175	118.7	0	48	0.87 ± 0.54
				350	175 x 175	125.7	0	48
				250	120 x 220	101.1	0	48
				250	120 x 220	103.2	0	48
				125	120 x 220	44.46	0	48
				125	120 x 220	49.96	0	48
	Brain	Büchi	11.5 ± 0.21 (n=2)	350	175 x 175	137.7	70	216	0.32 ± 0.050
				350	175 x 175	117.5	70	216
				250	120 x 220	96.91	70	216
				250	120 x 220	105.2	70	216
				125	120 x 220	49.5	70	216
				125	120 x 220	46.84	70	216
	Kidney	Büchi	3.91 ± 0.015 (n=2)	350	175 x 175	124	70	216	1.0 ± 0.08
				350	175 x 175	131.3	70	216
				250	120 x 220	99.94	70	216
				250	120 x 220	99.07	70	216
				125	120 x 220	49.94	70	216
				125	120 x 220	48.6	70	216
Harbor Porpoise 6 (P.p. 6)	Liver	Büchi	4.07 ± 0.091 (n=2)	350	175 x 175	119	70	192	0.52 ± 0.0052
				350	175 x 175	112.2	70	192
	Blubber	Büchi	95.3 ± 0.48 (n=2)	350	175 x 175	124	70	192	2.1 ± 0.0068
				350	175 x 175	117.3	70	192
	Brain	Waring lab	6.76 ± 0.027 (n=2)	350	175 x 175	122.9	70	192	0.14 ± 0.0019
				350	175 x 175	130.4	70	192
	Kidney	Waring lab	3.16 ± 0.0056 (n=2)	350	175 x 175	116.7	70	192	0.30 ± 0.00087
				350	175 x 175	122.5	70	192
Harbor Porpoise 7 (P.p. 7)	Liver	Büchi	4.41 ± 0.16 (n=2)	350	175 x 175	114.7	70	192	0.72 ± 0.0028
				350	175 x 175	118.6	70	192
	Blubber	Büchi	93.6 ± 3.3 (n=2)	350	175 x 175	131.7	0	48	1.5 ± 0.00059
				350	175 x 175	122.6	0	48
Harbor Seal 1 (P.v. 1)	Liver	Büchi	22.5 ± 0.42 (n=4)	350	175 x 175	128.7	70	216	1.8 ± 0.20
				350	175 x 175	127	70	216
				250	120 x 220	103.2	70	216
				250	120 x 220	96.25	70	216
				125	120 x 220	49.82	70	216
				125	120 x 220	47.85	70	216
	Blubber	Büchi	98.9 ± 0.24 (n=2)	350	175 x 175	130.7	0	48	0.70 ± 0.051
				350	175 x 175	124.5	0	48
				250	120 x 220	93.4	0	48
				250	120 x 220	100.9	0	48
				125	120 x 220	52.65	0	48
				125	120 x 220	51.41	0	48
	Brain	Büchi	10.2 ± 0.18 (n=2)	350	175 x 175	127.6	70	216	0.31 ± 0.030
				350	175 x 175	119.6	70	216
				250	120 x 220	97.36	70	216
				250	120 x 220	102.4	70	216
				125	120 x 220	51.37	70	216
				125	120 x 220	51.58	70	216
	Kidney	Büchi	3.86 ± 0.017 (n=2)	350	175 x 175	123.7	70	216	0.94 ± 0.022
				350	175 x 175	133.5	70	216
				250	120 x 220	95.91	70	216
				250	120 x 220	100.3	70	216
				125	120 x 220	53.28	70	216
				125	120 x 220	51.63	70	216
Harbor Seal 2 (P.v. 2)	Liver	Büchi	2.39 ± 0.013 (n=2)	350	175 x 175	114.2	70	192	0.49 ± 0.014
				350	175 x 175	119.5	70	192
	Blubber	Büchi	95.1 ± 0.29 (n=2)	350	175 x 175	124.9	0	48	0.90 ± 0.0053
				350	175 x 175	113.8	0	48
	Brain	Büchi	7.74 ± 0.0064 (n=2)	350	175 x 175	132.1	70	192	0.14 ± 0.0045
				350	175 x 175	116.5	70	192
	Kidney	Büchi	3.15 ± 0.1 (n=2)	350	175 x 175	129	70	192	0.75 ± 0.00064
				350	175 x 175	116.3	70	192
Harbor Seal 3 (P.v. 3)	Liver	Waring lab	2.59 ± 0.053 (n=2)	350	175 x 175	114.8	70	192	0.53 ± 0.0015
				350	175 x 175	118.8	70	192
	Blubber	Büchi	101 ± 0.34 (n=2)	350	175 x 175	122.7	0	48	0.81 ± 0.0026
				350	175 x 175	126.1	0	48
	Brain	Waring lab	6.92 ± 0.056 (n=2)	350	175 x 175	132.4	70	192	0.11 ± 0.0024
				350	175 x 175	114.1	70	192
	Kidney	Waring lab	3.51 ± 0.21 (n=2)	350	175 x 175	135.9	70	192	0.44 ± 0.0043
				350	175 x 175	119.6	70	192
Ringed Seal (P.h. 1)	Liver	Büchi	1.85 ± 0.090 (n=2)	350	175 x 175	118.6	70	192	0.43 ± 0.015
				350	175 x 175	120.9	70	192
	Blubber	Büchi	83.2 ± 2.1 (n=2)	350	175 x 175	114.9	0	48	0.69 ± 0.021
				350	175 x 175	127	0	48
Orca 1 (O.o. 1)	Liver	Waring lab	9.03 ± 0.42 (n=2)	350	175 x 175	122.9	70	216	1.3 ± 0.050
				350	175 x 175	117.8	70	216
				250	120 x 220	94.61	70	216
				250	120 x 220	97.45	70	216
				125	120 x 220	53.28	70	216
				125	120 x 220	49.37	70	216
	Blubber	Waring lab	36.8 ± 2.1 (n=2)	350	175 x 175	119.6	0	72	1.1 ± 0.079
				350	175 x 175	128.5	0	72
				250	120 x 220	101.2	0	72
				250	120 x 220	101.9	0	72
				125	120 x 220	56.27	0	72
				125	120 x 220	51.88	0	72
	Brain	Waring lab	8.2 ± 0.11 (n=2)	350	175 x 175	118.8	70	216	0.20 ± 0.039
				350	175 x 175	130.9	70	216
				250	120 x 220	93.08	70	216
				250	120 x 220	100.4	70	216
				125	120 x 220	53.35	70	216
				125	120 x 220	45.71	70	216
	Kidney	Waring lab	1.99 ± 0.16 (n=2)	350	175 x 175	116	70	216	0.66 ± 0.078
				350	175 x 175	126.7	70	216
				250	120 x 220	100.3	70	216
				250	120 x 220	99.78	70	216
				125	120 x 220	45.55	70	216
				125	120 x 220	43.62	70	216
* Tissues with low volume (<80g) were homogenized with a 8011E, Waring lab, Torrington, USA; for larger tissue volume a Mixer B-400, Büchi, Essen, Germany was used.

## Sheet: Table S3
Table S3. List of target chemicals, their compound categories, CAS number, chemical formula and the respective internal standards used for quantification. The chemicals were grouped in different categories according to their chemical family or usage: Polychlorinated biphenyls (PCBs) (n=13), Polyaromatic Hydrocarbons (PAHs) (n=26), Organochlorine Pesticides (OCPs) (n=23), Brominated Flame Retardan…
Compound Name	abbreviation	compound categorie	CAS	Chemical Formula	Internal Standard
2,2',5-Trichlorobiphenyl	PCB 18	PCB	37680-65-2	C12H7Cl3	PCB28_13C12
2,4,4'-Trichlorobiphenyl	PCB 28/31	PCB	7012-37-5	C12H7Cl3	PCB28_13C12
2,2',3,5'-tetrachlorobiphenyl	PCB 44	PCB	41464-39-5	C12H6Cl4	PCB52_13C12
2,2',5,5'-Tetrachlorobiphenyl	PCB 52	PCB	35693-99-3	C12H6Cl4	PCB52_13C12
2,2',4,5,5'-Pentachlorobiphenyl	PCB 101	PCB	37680-73-2	C12H5Cl5	PCB101_13C12
2,3',4,4',5-Pentachlorobiphenyl	PCB 118	PCB	31508-00-6	C12H5Cl5	PCB153_13C12
2,2',3,4,4',5'-Hexachlorobiphenyl	PCB 138	PCB	35065-28-2	C12H4Cl6	PCB138_13C12
2,2',3,4',5',6-Hexachlorobiphenyl	PCB 149	PCB	38380-04-0	C12H4Cl6	PCB153_13C12
2,2',4,4',5,5'-Hexachlorobiphenyl	PCB 153	PCB	35065-27-1	C12H4Cl6	PCB153_13C12
2,2',3,3',4,4',5-Heptachlorobiphenyl	PCB 170	PCB	35065-30-6	C12H3Cl7	PCB180_13C12
2,2',3,4,4',5,5'-Heptachlorobiphenyl	PCB 180	PCB	35065-29-3	C12H3Cl7	PCB180_13C12
2,2',3,3',4,4',5,5'-Octachlorobiphenyl	PCB 194	PCB	35694-08-7	C12H2Cl8	BDE99_13C12
Decachlorobiphenyl	PCB 209	PCB	2051-24-3	C12Cl10	13C12_Decachlorobiphenyl
Acenaphthene		PAH	83-32-9	C12H10	Acenaphthen-D10
Acenaphthylene		PAH	208-96-8	C12H8	Acenaphthen-D10
Anthracene		PAH	120-12-7	C14H10	Phenanthrene-D10
Benz[a]anthracene		PAH	56-55-3	C18H12	Chrysene-D12
Benzo[a]pyrene		PAH	50-32-8	C20H12	benzo[a]pyrene-d12
Benzo[b]fluoranthene		PAH	205-99-2	C20H12	benzo[a]pyrene-d12
Benzo[b]fluorene		PAH	243-17-4	C17H12	PCB138_13C12
Benzo[e]pyrene		PAH	192-97-2	C20H12	benzo[a]pyrene-d12
Benzo[ghi]perylene		PAH	191-24-2	C22H12	Perylene-D12
Benzo[k]fluoranthene		PAH	207-08-9	C20H12	benzo[a]pyrene-d12
Chrysene		PAH	218-01-9	C18H12	Chrysene-D12
Cyclopenta[cd]pyrene		PAH	27208-37-3	C18H10	Chrysene-D12
4H-Cyclopenta[def]phenanthrene		PAH	203-64-5	C15H10	PCB52_13C12
Dibenz[a,h]anthracene		PAH	53-70-3	C22H14	Perylene-D12
Dibenzo[a,e]pyrene		PAH	192-65-4	C24H14	Perylene-D12
Fluoranthene		PAH	206-44-0	C16H10	Pyrene-D10
Fluorene		PAH	86-73-7	C13H10	Phenanthrene-D10
Indeno[1,2,3cd]fluoranthene		PAH	193-43-1	C22H12	Perylene-D12
Indeno[1,2,3-cd]pyrene		PAH	193-39-5	C22H12	Perylene-D12
Perylene		PAH	198-55-0	C20H12	Perylene-D12
Phenanthrene		PAH	85-01-8	C14H10	Phenanthrene-D10
Pyrene		PAH	129-00-0	C16H10	Pyrene-D10
m-Terphenyl		PAH	92-06-8	C18H14	Pyrene-D10
o-Terphenyl		PAH	84-15-1	C18H14	PCB28_13C12
p-Terphenyl		PAH	92-94-4	C18H14	Pyrene-D10
9-vinylanthracene		PAH	2444-68-0	C16H12	PCB52_13C12
Aldrin		OCP	309-00-2	C12H8Cl6	PCB52_13C12
p,p'-Dichlorodiphenyldichloroethane	4,4'-DDE	OCP	72-55-9	C14H8Cl4	PCB153_13C12
p,p'-Dichlorodiphenyldichloroethylene	4,4'-DDD	OCP	72-54-8	C14H10Cl4	4,2'-DDT-D8
p,p'-Dichlorodiphenyltrichloroethane	4,4'-DDT	OCP	50-29-3	C14H9Cl5	PCB138_13C12
1,1-Bis(p-chlorophenyl)-2-chloroethene	4,4'-DDMU	OCP	1022-22-6	C14H9Cl3	PCB101_13C12
1,1-Dichloro-2,2-bis(4-methoxyphenyl)ethan		OCP	7388-31-0	C16H16Cl2O2	PCB138_13C12
Dicofol		OCP	115-32-2	C14H9Cl5O	PCB52_13C12
Dieldrin		OCP	60-57-1	C12H8Cl6O	PCB153_13C12
alpha-Endosulfan		OCP	959-98-8	C9H6Cl6O3S	Pyrene-D10
beta-Endosulfan		OCP	33213-65-9	C9H6Cl6O3S	PCB153_13C12
Endosulfan sulfate		OCP	1031-07-8	C9H6Cl6O4S	PCB138_13C12
Endrin		OCP	72-20-8	C12H8Cl6O	PCB153_13C12
Endrin aldehyde		OCP	7421-93-4	C12H8cL6O	PCB153_13C12
Endrin ketone		OCP	53494-70-5	C12H8Cl6O	Chrysene-D12
Heptachlor		OCP	76-44-8	C10H5Cl7	PCB52_13C12
Heptachlor-endo-epoxide		OCP	28044-83-9	C10H5Cl7O	PCB101_13C12
α-hexachlorocyclohexane	α-HCH	OCP	319-84-6	C6H6Cl6	Hexachlorobenzene-13C6
β-hexachlorocyclohexane	β- HCH	OCP	319-85-7	C6H6Cl6	beta HCH-13C6
γ-hexachlorocyclohexane	γ-HCH	OCP	58-89-9	C6H6Cl6	beta HCH-13C6
δ- hexachlorocyclohexane	δ-HCH	OCP	319-86-8	C6H6Cl6	beta HCH-13C6
Methoxychlor		OCP	72-43-5	C16H15Cl3O2	PCB180_13C12
Pentachloronitrobenzene		OCP	82-68-8	C6Cl5NO2	beta HCH-13C6
Triclosan-methyl		OCP	[4640-01-1]	C13H9Cl3O2	Pyrene-D10
3-Bromocarbazole		BDE	1592-95-6	C12H8BrN	PCB153_13C12
Hexabromobenzene		BDE	87-82-1	C6Br6	Chrysene-D12
2,2',4,4'-Tetrabromdiphenyl ether	BDE-47	BDE	5436-43-1	C12H6Br4O	PCB180_13C12
2,2',4,4',5-Pentabromodiphenyl ether	BDE-99	BDE	60348-60-9	C12H5Br5O	2,2′,4,4′,5-Pentabrom(13C12)diphenylether_(PBDE99)_13C12
2,2',4,4',5,5'-Hexabromodiphenyl ether	BDE-153	BDE	68631-49-2	C12H4Br6O	13C12_Decachlorobiphenyl
2,2',4,4',5,6'-Hexabromodiphenyl ether	BDE-154	BDE	207122-15-4	C12H4Br6O	13C12_Decachlorobiphenyl
Acrinathrin		Pyr	101007-06-1	C26H21F6NO5	PCB180_13C12
Allethrin		Pyr	584-79-2	C19H26O3	PCB101_13C12
Bifenthrin		Pyr	82657-04-3	C23H22ClF3O2	Chrysene-D12
Cyfluthrin		Pyr	68359-37-5	C22H18Cl2FNO3	2,2′,4,4′,5-Pentabrom(13C12)diphenylether_(PBDE99)_13C12
Cyhalothrin		Pyr	91465-08-6	C23H19ClF3NO3	PCB180_13C12
Cypermethrin		Pyr	52315-07-8	C22H19Cl2NO3	benzo[a]pyrene-d12
Deltamethrin		Pyr	52918-63-5	C22H19Br2NO3	Perylene-D12
Esfenvalerate		Pyr	66230-04-4	C25H22ClNO3	Perylene-D12
Etofenprox		Pyr	80844-07-1	C25H28O3	Etofenprox-D5
Fluvalinate		Pyr	69409-94-5	C26H22ClF3N2O3	Perylene-D12
Permethrin		Pyr	52645-53-1	C21H20Cl2O3	2,2′,4,4′,5-Pentabrom(13C12)diphenylether_(PBDE99)_13C12
Prallethrin		Pyr	23031-36-9	C19H24O3	PCB101_13C12
Tefluthrin		Pyr	79538-32-2	C17H14ClF7O2	Phenanthrene-D10
Transfluthrin		Pyr	118712-89-3	C15H12Cl2F4O2	PCB52_13C12
1-Chloro-2-nitrobenzene		CHC	88-73-3	C6H4ClNO2	Naphthalene-D8
Hexachlorobenzene		CHC	118-74-1	C6Cl6	Hexachlorobenzene-13C6
Pentachlorobenzene		CHC	608-93-5	C6HCl5	Acenaphthen-D10
Ambrettolide		musks	123-69-3	C16H28O2	PCB52_13C12
Celestolide		musks	13171-00-1	C17H24O	Hexachlorobenzene-13C6
Galaxolide		musks	1222-05-5	C18H26O	Tonalide-D3
Musk ambrette		musks	83-66-9	C16H28O2	Tonalide-D3
Musk ketone		musks	81-14-1	C14h18N2O5	PCB52_13C12
Musk xylene		musks	81-15-2	C12H15N3O6	Tonalide-D3
Phantolide		musks	15323-35-0	C17H24O	beta HCH-13C6
Tonalide		musks	21145-77-7	C18H26O	Tonalide-D3
Velvione		musks	37609-25-9	C16H28O	PCB52_13C12
2-Acetonaphthone		Others	93-08-3	C12H10O	Hexachlorobenzene-13C6
Benzyl benzoate		Others	120-51-4	C14H12O2	Phenanthrene-D10
p-Benzyldiphenyl		Others	613-42-3	C19H16	PCB52_13C12
Benzyl-2-naphthylether		Others	613-62-7	C17H14O	Pyrene-D10
Bis(4-chlorophenyl)sulfone		Others	80-07-9	C12H8Cl2O2S	PCB153_13C12
Chlorpyrifos		Others	2921-88-2	C9H11Cl3NO3PS	PCB52_13C12
Dibutylhydroxytoluene		Others	128-37-0	C15H24O	Acenaphthen-D10
2,6-Diisopropylnaphthalene		Others	24157-81-1	C16H20	beta HCH-13C6
2,2-Dimethoxy-2-phenylacetophenone	DMPA	Others	24650-42-8	C16H16O3	PCB28_13C12
Diphenyl sulfone		Others	127-63-9	C12H10O2S	PCB52_13C12
Diphenylmethane		Others	101-81-5	C13H12	Acenaphthen-D10
2,6-di-tert-Butylphenol		Others	128-39-2	C14H22O	Acenaphthen-D10
Ethylene glycol diphenylether		Others	104-66-5	C14H14O2	Phenanthrene-D10
Homosalate		Others	118-56-9	C16H22O3	PCB28_13C12
4-Methylbenzylidene camphor	Enzacamene	Others	36861-47-9	C18H22O	PCB101_13C12
trans-alpha-Methylstilbene		Others	103-30-0/833-81-8	C15H14	Hexachlorobenzene-13C6
Methyl phenyl sulfone		Others	3112-85-4	C7H8O2S	Acenaphthen-D10
Methyl tolyl sulfone		Others	3185-99-7	C8H10O2S	Acenaphthen-D10
1-Phenylnaphthalene		Others	605-02-7	C16H12	Tonalide-D3
cis-Stilbene		Others	645-49-8	C14H12	Acenaphthen-D10
Dioctyldiphenylamine		Others	101-67-7	C28H43N	Perylene-D12
Piperonyl butoxide		Others	51-03-6	C19H30O5	Chrysene-D12
alpha-Tocopherol acetate		Others	7695-91-2	C31H52O3	Perylene-D12

## Sheet: Table S4
Table S4. Chemicals detected in this study, their MDL (Method Detection Limits), their physiochemical properties (octanol-water partition constants (log Kow), medium-air partition constants Kmedium/air and lipid-PDMS partition constants Klipid/PDMS) and the effect data expressed as cytotoxicity (IC10) and effect concentrations (EC10) in the assays of PPARγ-bla, AhR-CALUX and AREc32.
Compound Name	CAS number	MDL [nganalyte/ mLextract]	Reference	log Kow	Reference	Kmedium/air	Reference +	experimental Klipid/PDMS values	Reference	log KPDMS/water	Reference	log Klipid/water	Reference	modeled Klipid/PDMS	Reference	Reference for LSERD descriptors	EC10 PPARγ-bla [M]	Reference	IC10 AhR-CALUX [M]	Reference	EC10 AhR-CALUX [M]	Reference	ECIR1.5 AREc32 [M]	Reference
PCB 18	37680-65-2	1	Rojo-Nieto et al., in prep.	5.52432	OPERA	17424.3	OPERA	12.2	Smedes et al., 2017	4.87	LSERD	5.94	LSERD	11.749	LSERD	Abraham Absolv	no data available		no data available		no data available		no data available
PCB 28/31	7012-37-5	5	Rojo-Nieto et al., in prep.	5.62206	OPERA	26190.3	OPERA	14.9	Smedes et al., 2017	4.99	LSERD	6.06	LSERD	11.749	LSERD	Abraham Absolv	1.52e-05	Lee et al. 2021	3.72e-05	Lee et al. 2021	not active	Lee et al. 2021	not active	Lee et al. 2021
PCB 44	41464-39-5	5	Rojo-Nieto et al., in prep.	5.91268	OPERA	66077.5	OPERA	15.8	Smedes et al., 2017	5.31	LSERD	6.5	LSERD	15.4882	LSERD	Abraham Absolv	no data available		no data available		no data available		no data available
PCB 52	35693-99-3	9.7	Rojo-Nieto et al., in prep.	6.1754	OPERA	77952.8	OPERA	17.1	Smedes et al., 2017	5.31	LSERD	6.5	LSERD	15.4882	LSERD	Abraham Absolv	not active	Lee et al. 2021	no cytotoxicity	Lee et al. 2021	not active	Lee et al. 2021	not active	Lee et al. 2021
PCB 101	37680-73-2	2.8	Rojo-Nieto et al., in prep.	6.10305	OPERA	149799	OPERA	22.1	Smedes et al., 2017	5.74	LSERD	7.04	LSERD	19.9526	LSERD	Abraham Absolv	not active	Lee et al. 2021	2.13e-05	Lee et al. 2021	not active	Lee et al. 2021	not active	Lee et al. 2021
PCB 118	31508-00-6	20	Rojo-Nieto et al., in prep.	7.10789	OPERA	1.3475e+06	OPERA	30.4	Smedes et al., 2017	5.86	LSERD	7.16	LSERD	19.9526	LSERD	Abraham Absolv	not active	Lee et al. 2021	1.38e-05	Lee et al. 2021	8.99e-08	Lee et al. 2021	not active	Lee et al. 2021
PCB 138	35065-28-2	4.3	Rojo-Nieto et al., in prep.	7.34477	OPERA	8.28576e+06	OPERA	26.6	Smedes et al., 2017	6.17	LSERD	7.58	LSERD	25.704	LSERD	Abraham Absolv	not active	Lee et al. 2021	1.84e-05	Lee et al. 2021	5.01e-07	Lee et al. 2021	not active	Lee et al. 2021
PCB 149	38380-04-0	7.1	Rojo-Nieto et al., in prep.	7.27232	OPERA	3.48938e+06	OPERA	25.4	Jahnke et al., 2008	6.15	LSERD	7.57	LSERD	26.3027	LSERD	Abraham Absolv	no data available		no data available		no data available		no data available
PCB 153	35065-27-1	6.9	Rojo-Nieto et al., in prep.	6.56189	OPERA	1.4661e+06	OPERA	27.9	Smedes et al., 2017	6.17	LSERD	7.58	LSERD	25.704	LSERD	Abraham Absolv	not active	Lee et al. 2021	3.75e-05	Lee et al. 2021	not active	Lee et al. 2021	not active	Lee et al. 2021
PCB 170	35065-30-6	2	Rojo-Nieto et al., in prep.	7.69323	OPERA	4.09887e+07	OPERA	30	Smedes et al., 2017	6.6	LSERD	8.13	LSERD	33.8844	LSERD	Abraham Absolv	no data available		no data available		no data available		no data available
PCB 180	35065-29-3	5	Rojo-Nieto et al., in prep.	7.71674	OPERA	3.98314e+07	OPERA	31	Smedes et al., 2017	6.58	LSERD	8.1	LSERD	33.1131	LSERD	Abraham Absolv	not active	Lee et al. 2021	1.33e-05	Lee et al. 2021	6.26e-07	Lee et al. 2021	not active	Lee et al. 2021
PCB 194	35694-08-7	18.8	Rojo-Nieto et al., in prep.	8.04102	OPERA	7.89859e+07	OPERA	57.3	Jahnke et al., 2008	7.08	LSERD	8.72	LSERD	43.6516	LSERD	Abraham Absolv	not active	Lee et al. 2021	1.36e-05	Lee et al. 2021	not active	Lee et al. 2021	not active	Lee et al. 2021
PCB 209	2051-24-3	4.63796	Muz et al. 2021	8.38184	OPERA	1.2404e+06	OPERA	25.7	Jahnke et al., 2008	7.91	LSERD	9.78	LSERD	74.131	LSERD	Abraham Absolv	no data available		1.99e-06	Baumer et al. 2021	8.1e-08	Baumer et al. 2021	not active	Baumer et al. 2021
Acenaphthene	83-32-9	5.6	Rojo-Nieto et al., in prep.	3.9209	OPERA	1348.16	OPERA	10.18	Smedes et al., 2017	3.43	LSERD	4.18	LSERD	5.62341	LSERD	Abraham Absolv	no data available		no data available		no data available		no data available
Acenaphthylene	208-96-8	1.9	Rojo-Nieto et al., in prep.	3.94091	OPERA	2247.74	OPERA	10.8	Smedes et al., 2017	3.07	LSERD	3.84	LSERD	5.88844	LSERD	Abraham Absolv	no data available		no data available		no data available		no data available
Anthracene	120-12-7	1.9	Rojo-Nieto et al., in prep.	4.45094	OPERA	10885.2	OPERA	17.7	Smedes et al., 2017	3.9	LSERD	4.9	LSERD	10	LSERD	Abraham Absolv	not active	Lee et al. 2021	4.44e-05	Lee et al. 2021	5.34e-06	Lee et al. 2021	4.78e-05	Lee et al. 2021
Benz[a]anthracene	56-55-3	3.1	Rojo-Nieto et al., in prep.	5.60152	OPERA	424931	OPERA	55.6	Smedes et al., 2017	4.87	LSERD	6.23	LSERD	22.9087	LSERD	Abraham Absolv	not active	Lee et al. 2021	7.57e-07	Lee et al. 2021	1.16e-08	Lee et al. 2021	2.76e-07	Lee et al. 2021
Benzo[b]fluorene	243-17-4	1	Rojo-Nieto et al., in prep.	5.76704	OPERA	638170	OPERA	23	average	4.92	LSERD	6.17	LSERD	17.7828	LSERD	Abraham Absolv	no data available		no data available		no data available		no data available
Benzo[e]pyrene	192-97-2	1	Muz et al. 2021	6.42775	OPERA	2.42011e+07	OPERA	23	average	5.36	LSERD	6.93	LSERD	37.1535	LSERD	Abraham Absolv	no data available		no data available		no data available		no data available
Cyclopenta[cd]pyrene	27208-37-3	1	Muz et al. 2021	5.70048	OPERA	1.11565e+06	OPERA	23	average	4.31	LSERD	5.63	LSERD	20.893	LSERD	SMILES	no data available		no data available		no data available		no data available
4H-Cyclopenta[def]phenanthrene	203-64-5	1	Rojo-Nieto et al., in prep.	4.9228	OPERA	53280.5	OPERA	23	average	3.68	LSERD	4.7	LSERD	10.4713	LSERD	SMILES	no data available		no data available		no data available		no data available
Fluoranthene	206-44-0	4.4	Rojo-Nieto et al., in prep.	5.16033	OPERA	244058	OPERA	30.3	Smedes et al., 2017	4.29	LSERD	5.44	LSERD	14.1254	LSERD	Abraham Absolv	1.6e-05	Lee et al. 2021	no cytotoxicity	Lee et al. 2021	3.01e-06	Lee et al. 2021	8.31e-05	Lee et al. 2021
Fluorene	86-73-7	1.6	Rojo-Nieto et al., in prep.	4.17953	OPERA	3946.59	OPERA	12.8	Smedes et al., 2017	3.64	LSERD	4.44	LSERD	6.30957	LSERD	Abraham Absolv	no data available		no data available		no data available		no data available
Phenanthrene	85-01-8	2.6	Rojo-Nieto et al., in prep.	4.46529	OPERA	14527	OPERA	20.8	Smedes et al., 2017	3.91	LSERD	4.88	LSERD	9.33254	LSERD	Abraham Absolv	0.000266	Lee et al. 2021	5.92e-05	Lee et al. 2021	1.1e-05	Lee et al. 2021	not active	Lee et al. 2021
Pyrene	129-00-0	2.2	Rojo-Nieto et al., in prep.	4.88312	OPERA	109888	OPERA	32.7	Smedes et al., 2017	4.16	LSERD	5.4	LSERD	17.378	LSERD	Abraham Absolv	not active	Lee et al. 2021	5.36e-05	Lee et al. 2021	4.4e-06	Lee et al. 2021	not active	Lee et al. 2021
9-vinylanthracene	2444-68-0	1.5	Rojo-Nieto et al., in prep.	4.91705	OPERA	31898.5	OPERA	23	average	4.99	LSERD	6.11	LSERD	13.1826	LSERD	SMILES	no data available		no data available		no data available		no data available
4,4'-DDE	72-55-9	1	Rojo-Nieto et al., in prep.	6.73301	OPERA	1.16452e+06	OPERA	17.8	Smedes et al., 2017	6.12	LSERD	7.43	LSERD	20.4174	LSERD	Abraham Absolv	not active	Lee et al. 2021	2.36e-05	Lee et al. 2021	not active	Lee et al. 2021	not active	Lee et al. 2021
4,4'-DDD	72-54-8	3.5	Rojo-Nieto et al., in prep.	6.12894	OPERA	2.13382e+06	OPERA	54.6	Smedes et al., 2017	5.59	LSERD	6.98	LSERD	24.5471	LSERD	Abraham Absolv	not active	Lee et al. 2021	3.3e-05	Lee et al. 2021	not active	Lee et al. 2021	not active	Lee et al. 2021
4,4'-DDT	50-29-3	2.7	Rojo-Nieto et al., in prep.	6.9101	OPERA	8.38095e+06	OPERA	36.5	Smedes et al., 2017	6.29	LSERD	7.75	LSERD	28.8403	LSERD	Abraham Absolv	not active	Lee et al. 2021	1.81e-05	Lee et al. 2021	not active	Lee et al. 2021	not active	Lee et al. 2021
4,4'-DDMU	1022-22-6	10	Rojo-Nieto et al., in prep.	5.67936	OPERA	528604	OPERA	23	average	4.43	LSERD	5.58	LSERD	14.1254	LSERD	SMILES	no data available		no data available		no data available		no data available
Dicofol	115-32-2	1	Muz et al. 2021	5.02414	OPERA	1.15196e+09	OPERA	23	average	4.57	LSERD	6.3	LSERD	53.7032	LSERD	SMILES	no data available		no data available		no data available		no data available
Dieldrin	60-57-1	79.09	Rojo-Nieto et al., in prep.	5.11788	OPERA	244313	OPERA	10.55	Smedes et al., 2017	4.1	LSERD	5.37	LSERD	18.6209	LSERD	Abraham Absolv	not active	Lee et al. 2021	no cytotoxicity	Lee et al. 2021	not active	Lee et al. 2021	not active	Lee et al. 2021
alpha-Endosulfan	959-98-8	65.33	Rojo-Nieto et al., in prep.	3.82812	OPERA	8870.36	OPERA	23	average	3.81	LSERD	4.94	LSERD	13.4896	LSERD	Abraham Absolv	no data available		no data available		no data available		3.55e-05	Tox21
Heptachlor-endo-epoxide	28044-83-9	17.0913	Muz et al. 2021	4.98145	OPERA	74207	OPERA	23	average	4.2	LSERD	5.25	LSERD	11.2202	LSERD	SMILES	no data available		no data available		no data available		no data available
α-HCH	319-84-6	2.95	Rojo-Nieto et al., in prep.	3.71918	OPERA	56430.1	OPERA	29.1	Smedes et al., 2017	2.94	LSERD	3.71	LSERD	5.88844	LSERD	Abraham Absolv	no data available		no data available		no data available		no data available
β- HCH	319-85-7	1	Muz et al. 2021	3.71918	OPERA	56430.1	OPERA	214	Smedes et al., 2017	2.81	LSERD	3.63	LSERD	6.60693	LSERD	Abraham Absolv	no data available		no data available		no data available		no data available
γ-HCH	58-89-9	1	Muz et al. 2021	3.71918	OPERA	56430.1	OPERA	33.5	Smedes et al., 2017	2.81	LSERD	3.64	LSERD	6.76083	LSERD	Abraham Absolv	no data available		no data available		no data available		no data available
δ-HCH	319-86-8	1	Muz et al. 2021	3.71918	OPERA	56430.1	OPERA	133	Smedes et al., 2017	2.98	LSERD	3.81	LSERD	6.76083	LSERD	Abraham Absolv	no data available		no data available		no data available		no data available
BDE-47	5436-43-1	3.6	Rojo-Nieto et al., in prep.	6.8068	OPERA	152809	OPERA	23	average	5.8	LSERD	7.14	LSERD	21.8776	LSERD	LSER Dataset for CompTox users (2017)	6.64e-06	Lee et al. 2021	2.02e-05	Lee et al. 2021	1.33e-05	Lee et al. 2021	not active	Lee et al. 2021
BDE-99	60348-60-9	3.2	Rojo-Nieto et al., in prep.	7.32051	OPERA	316409	OPERA	23	average	6.18	LSERD	7.65	LSERD	29.5121	LSERD	LSER Dataset for CompTox users (2017)	not active	Lee et al. 2021	1.99e-05	Lee et al. 2021	2.39e-06	Lee et al. 2021	not active	Lee et al. 2021
Allethrin	584-79-2	10	Rojo-Nieto et al., in prep.	4.78026	OPERA	120422	OPERA	23	average	4.02	LSERD	5.33	LSERD	20.4174	LSERD	SMILES	no data available		no cytotoxicity	Tox21	not active	Tox21	6.71e-05	Tox21
Bifenthrin	82657-04-3	3.92304	Muz et al. 2021	6.18611	OPERA	3.27195e+08	OPERA	23	average	5.9	LSERD	7.48	LSERD	38.0189	LSERD	LSER Dataset for CompTox users (2017)	not active	Lee et al. 2021	no data available		no data available		not active	Lee et al. 2021
Cyhalothrin	91465-08-6	1	Rojo-Nieto et al., in prep.	6.7988	OPERA	4.93354e+09	OPERA	23	average	3.81	LSERD	5.79	LSERD	95.4993	LSERD	SMILES	not active	Lee et al. 2021	1.67e-05	Lee et al. 2021	not active	Lee et al. 2021	not active	Lee et al. 2021
Etofenprox	80844-07-1	2	Rojo-Nieto et al., in prep.	7.04879	OPERA	4.29189e+07	OPERA	23	average	5.85	LSERD	7.73	LSERD	75.8578	LSERD	SMILES	not active	Tox21	no cytotoxicity	Tox21	not active	Tox21	not active	Tox21
Prallethrin	23031-36-9	1	Rojo-Nieto et al., in prep.	4.48975	OPERA	3.99244e+08	OPERA	23	average	3.37	LSERD	4.75	LSERD	23.9883	LSERD	SMILES	no data available		no cytotoxicity	Tox21	not active	Tox21	no data available
Permethrin	52645-53-1	11.4	Rojo-Nieto et al., in prep.	6.49886	OPERA	1.25275e+09	OPERA	23	average	6.14	LSERD	7.77	LSERD	42.658	LSERD	Abraham Absolv	not active	Lee et al. 2021	1.95e-05	Lee et al. 2021	not active	Lee et al. 2021	not active	Lee et al. 2021
Transfluthrin	118712-89-3	1	Muz et al. 2021	5.46182	OPERA	7.67047e+08	OPERA	23	average	5.1	LSERD	6.15	LSERD	11.2202	LSERD	SMILES	not active	Lee et al. 2021	1.6e-05	Lee et al. 2021	not active	Lee et al. 2021	not active	Lee et al. 2021
Hexachlorobenzene	118-74-1	45.69	Rojo-Nieto et al., in prep.	5.72859	OPERA	3799.18	OPERA	11.78	Smedes et al., 2017	5.02	LSERD	5.75	LSERD	5.37032	LSERD	Abraham Absolv	no data available		no data available		no data available		no data available
Pentachlorobenzene	608-93-5	39.31	Rojo-Nieto et al., in prep.	5.17409	OPERA	3173.33	OPERA	10.15	Smedes et al., 2017	4.45	LSERD	5.22	LSERD	5.88844	LSERD	Abraham Absolv	no data available		no data available		no data available		no data available
Galaxolide	1222-05-5	10	Rojo-Nieto et al., in prep.	5.89831	OPERA	29444.3	OPERA	23	average	4.9	LSERD	6.08	LSERD	15.1356	LSERD	Abraham Absolv	no data available		1.54e-05	Baumer et al. 2021	not active	Baumer et al. 2021	not active	Baumer et al. 2021
Tonalide	21145-77-7	1	Rojo-Nieto et al., in prep.	5.69897	OPERA	126177	OPERA	23	average	5.03	LSERD	6.22	LSERD	15.4882	LSERD	SMILES	not active	Lee et al. 2021	5.12e-05	Lee et al. 2021	not active	Lee et al. 2021	not active	Lee et al. 2021
2-Acetonaphthone	93-08-3	1	Rojo-Nieto et al., in prep.	3.0504	OPERA	41859.5	OPERA	23	average	1.89	LSERD	2.79	LSERD	7.94328	LSERD	Abraham Absolv	not active	Tox21	no cytotoxicity		not active		not active	Tox21
Benzyl benzoate	120-51-4	2.2	Rojo-Nieto et al., in prep.	3.96773	OPERA	8.11009e+06	OPERA	23	average	3.06	LSERD	4.07	LSERD	10.2329	LSERD	Abraham Absolv	not active	Tox21	no cytotoxicity	Tox21	not active	Tox21	not active	Tox21
p-Benzyldiphenyl	613-42-3	1	Muz et al. 2021	5.76589	OPERA	2.64999e+06	OPERA	23	average	5.39	LSERD	6.57	LSERD	15.1356	LSERD	SMILES	no data available		no data available		no data available		no data available
Benzyl-2-naphthylether	613-62-7	1	Rojo-Nieto et al., in prep.	4.55306	OPERA	24013.2	OPERA	23	average	3.83	LSERD	5.13	LSERD	19.9526	LSERD	SMILES	no data available		no data available		no data available		no data available
Bis(4-chlorophenyl)sulfone	80-07-9	3.51	Rojo-Nieto et al., in prep.	3.3139	OPERA	16462	OPERA	23	average	2.79	LSERD	4.17	LSERD	23.9883	LSERD	Abraham Absolv	not active	Tox21	no cytotoxicity	Tox21	not active	Tox21	7.5e-05	Tox21
Dibutylhydroxytoluene	128-37-0	1	Muz et al. 2021	5.09929	OPERA	242765	OPERA	23	average	4.35	LSERD	5.48	LSERD	13.4896	LSERD	Abraham Absolv	not active	Tox21	no cytotoxicity		no data available		not active	Tox21
2,6-Diisopropylnaphthalene	24157-81-1	1	Muz et al. 2021	5.93128	OPERA	18251.5	OPERA	23	average	5.43	LSERD	6.38	LSERD	8.91251	LSERD	SMILES	no data available		no data available		no data available		no data available
DMPA	24650-42-8	1	Rojo-Nieto et al., in prep.	3.68304	OPERA	1.68421e+07	OPERA	23	average	1.96	LSERD	3.23	LSERD	18.6209	LSERD	SMILES	not active	Tox21	no cytotoxicity	Tox21	not active	Tox21	not active	Tox21
Diphenyl sulfone	127-63-9	3.4	Rojo-Nieto et al., in prep.	2.39911	OPERA	2862.6	OPERA	23	average	1.18	LSERD	2.42	LSERD	17.378	LSERD	Abraham Absolv	no data available		no data available		no data available		no data available
Diphenylmethane	101-81-5	4	Rojo-Nieto et al., in prep.	4.14124	OPERA	687.864	OPERA	23	average	3.51	LSERD	4.32	LSERD	6.45654	LSERD	Abraham Absolv	no data available		no data available		no data available		no data available
2,6-di-tert-Butylphenol	128-39-2	1	Rojo-Nieto et al., in prep.	4.92004	OPERA	146588	OPERA	23	average	3.63	LSERD	4.73	LSERD	12.5893	LSERD	Abraham Absolv	not active	Tox21	no cytotoxicity	Tox21	not active	Tox21	not active	Tox21
Ethylene glycol diphenylether	104-66-5	37.1	Rojo-Nieto et al., in prep.	3.8092	OPERA	9356.98	OPERA	23	average	2.57	LSERD	3.57	LSERD	10	LSERD	SMILES	not active	Tox21	no cytotoxicity	Tox21	6.36e-05	Tox21	not active	Tox21
Homosalate	118-56-9	1	Muz et al. 2021	4.18727	OPERA	2.45978e+08	OPERA	23	average	5.3	LSERD	6.42	LSERD	13.1826	LSERD	SMILES	not active	Tox21	no cytotoxicity	Tox21	not active	Tox21	not active	Tox21
Enzacamene	36861-47-9	1.8	Rojo-Nieto et al., in prep.	6.06632	OPERA	1.03708e+06	OPERA	23	average	3.88	LSERD	5.11	LSERD	16.9824	LSERD	SMILES	not active	Tox21	no cytotoxicity	Tox21	not active	Tox21	not active	Tox21
trans-alpha-Methylstilbene	103-30-0/833-81-8	10	Rojo-Nieto et al., in prep.	4.25194	OPERA	8393.19	OPERA	23	average	3.97	LSERD	4.84	LSERD	7.4131	LSERD	Abraham Absolv	no data available		no data available		no data available		no data available
Methyl phenyl sulfone	3112-85-4	26.2	Rojo-Nieto et al., in prep.	0.502082	OPERA	350301	OPERA	23	average	-0.71	LSERD	0.18	LSERD	7.76247	LSERD	Abraham Absolv	no data available		no data available		no data available		no data available
1-Phenylnaphthalene	605-02-7	3.5	Rojo-Nieto et al., in prep.	5.11441	OPERA	113230	OPERA	23	average	4.51	LSERD	5.58	LSERD	11.749	LSERD	Abraham Absolv	no data available		no data available		no data available		no data available
cis-Stilbene	645-49-8	10	Rojo-Nieto et al., in prep.	4.80841	OPERA	8913.37	OPERA	23	average	3.76	LSERD	4.7	LSERD	8.70964	LSERD	SMILES	no data available		no data available		no data available		no data available
alpha-Tocopherol acetate	7695-91-2	33.9	Rojo-Nieto et al., in prep.	9.15335	OPERA	1.59457e+10	OPERA	23	average	11.39	LSERD	13.5	LSERD	128.825	LSERD	SMILES	no data available		no data available		no data available		no data available
+ Calculated from predicted OPERA predicted coefficients: (Henry's law constant, partition coefficient values: octanol/air, octanol/water, lipid/water, BSA/water)
References
M. Muz, E. Rojo-Nieto and A. Jahnke, Removing Disturbing Matrix Constituents from Biota Extracts from Total Extraction and Silicone-Based Passive Sampling, Environ Toxicol Chem, 2021, 40, 2693-2704.
E. Rojo-Nieto, M. Muz, J. Watzke and A. Jahnke, Using chemometers to understand the thermodynamics of bioaccumulation in aquatic environments (in prep.).
F. Smedes, T. P. Rusina, H. Beeltje and P. Mayer, Partitioning of hydrophobic organic contaminants between polymer and lipids for two silicones and low density polyethylene, Chemosphere, 2017, 186, 948-957.
A. Jahnke, M. S. McLachlan and P. Mayer, Equilibrium sampling: partitioning of organochlorine compounds from lipids into polydimethylsiloxane, Chemosphere, 2008, 73, 1575-1581.
N. Ulrich, S. Endo, T. N. Brown, N. Watanabe, G. Bronner, M. H. Abraham and K. U. Goss, UFZ-LSER database v 3.2, Helmholtz Centre for Environmental Research-UFZ, Leipzig,Germany, (accessed December, 2022); http://www.ufz.de/lserd, 2017.
J. Lee, G. Braun, L. Henneberger, M. König, R. Schlichting, S. Scholz and B. I. Escher, Critical Membrane Concentration and Mass-Balance Model to Identify Baseline Cytotoxicity of Hydrophobic and Ionizable Organic Chemicals in Mammalian Cell Lines, Chemical Research in Toxicology, 2021, 34, 2100-2109.
A. Baumer, S. Jäsch, N. Ulrich, I. Bechmann, J. Landmann, A. Stover and B. I. Escher, Chemical mixtures in human post-mortem tissues assessed by a combination of chemical analysis and in vitro bioassays after extraction with silicone, Environ Int, 2021, 157, 106867.
"Tox21" refers to reevaluated data from: B. I. Escher, L. Henneberger, M. Konig, R. Schlichting and F. C. Fischer, Cytotoxicity Burst? Differentiating Specific from Nonspecific Effects in Tox21 in Vitro Reporter Gene Assays, Environ Health Perspect, 2020, 128, 77007.

## Sheet: Table S5
Table S5. Analytical results of the PDMS extracts in cPDMS (pganalyte/mgPDMS). Compounds below the MDL were considered as not detected (n.d.). Blank-substracted and lipid-corrected results of all animals: P.p.: harbor porpoise, P.v.: harbor seal, P.h.: ringed seal, O.o.: orca, plus running number. Values that exceeded the maximal concentration of the highest concentrations are marked in orange (t…
Compound Name	CAS		P.p.1, Liver						P.p.1, Blubber		P.p.2, Liver					P.p.2, Blubber		P.p.3, Liver						P.p.3, Blubber		P.p.3, Brain						P.p.3, Kidney				P.p.4, Liver						P.p.4, Blubber		P.p.4, Brain
		PDMS thickness	125	125	250	250	350	350	350	350	125	250	250	350	350	350	350	125	125	250	250	350	350	350	350	125	125	250	250	350	350	125	250	250	350	125	125	250	250	350	350	350	350	125	125	250	250	350	350
PCB 18	37680-65-2		11.5892	14.3819	14.6688	15.9858	12.836	16.6159	n.d.	1.06356	0.595974	0.847393	0.857138	0.963114	0.889243	0.505716	n.d.	n.d.	n.d.	n.d.	n.d.	n.d.	n.d.	n.d.	n.d.	n.d.	n.d.	0.535233	n.d.	0.319934	0.247821	n.d.	n.d.	n.d.	n.d.	n.d.	n.d.	0.964338	1.29704	0.769926	1.80207	1.09668	0.839433	0.888756	0.772556	1.21886	1.05024	1.01446	1.08099
PCB 28/31	7012-37-5		n.d.	n.d.	n.d.	n.d.	n.d.	0.573184	n.d.	n.d.	n.d.	n.d.	n.d.	n.d.	n.d.	n.d.	n.d.	n.d.	n.d.	n.d.	n.d.	n.d.	n.d.	n.d.	n.d.	n.d.	n.d.	n.d.	n.d.	n.d.	n.d.	n.d.	n.d.	n.d.	n.d.	n.d.	n.d.	n.d.	n.d.	n.d.	n.d.	n.d.	n.d.	n.d.	n.d.	n.d.	n.d.	n.d.	n.d.
PCB 44	41464-39-5		n.d.	n.d.	n.d.	n.d.	n.d.	n.d.	n.d.	n.d.	n.d.	n.d.	n.d.	n.d.	n.d.	n.d.	n.d.	n.d.	n.d.	n.d.	n.d.	n.d.	n.d.	n.d.	n.d.	n.d.	n.d.	n.d.	n.d.	n.d.	n.d.	n.d.	n.d.	n.d.	n.d.	n.d.	n.d.	n.d.	n.d.	n.d.	n.d.	1.75356	n.d.	n.d.	n.d.	n.d.	n.d.	n.d.	n.d.
PCB 52	35693-99-3		49.9564	62.2573	42.5121	66.1711	75.9973	82.964	22.6465	18.9213	22.985	22.7402	25.4272	25.1444	23.6241	10.2341	10.5927	n.d.	n.d.	n.d.	n.d.	n.d.	n.d.	n.d.	n.d.	n.d.	n.d.	n.d.	n.d.	n.d.	n.d.	n.d.	n.d.	n.d.	n.d.	12.8488	n.d.	14.6488	14.7037	14.562	n.d.	13.8605	13.3343	7.55564	7.67433	8.45987	8.46565	8.77854	8.7619
PCB 101	37680-73-2		23.7202	28.5911	28.9608	33.9336	37.8139	40.6766	14.7969	12.9653	56.7231	55.6241	53.2182	54.0595	53.2715	17.4085	16.9016	5.20727	3.46398	n.d.	3.23583	4.07675	5.30803	3.76702	3.60389	5.69542	4.85712	5.15598	4.38581	4.16996	3.99251	5.21985	5.65268	5.65711	4.82395	16.8385	n.d.	15.2642	15.1074	12.2279	12.646	11.727	12.9379	9.26038	9.45407	9.80468	9.31422	9.25248	8.9356
PCB 118	31508-00-6		25.8235	29.6073	27.9223	32.5384	43.3419	44.7511	12.3089	n.d.	49.9897	49.213	49.9667	47.7244	48.9159	9.56685	5.35345	n.d.	n.d.	n.d.	n.d.	n.d.	n.d.	n.d.	n.d.	n.d.	n.d.	n.d.	n.d.	n.d.	n.d.	n.d.	n.d.	n.d.	n.d.	n.d.	n.d.	n.d.	n.d.	n.d.	13.0544	6.0701	n.d.	n.d.	n.d.	7.47938	7.25151	5.03827	7.22569
PCB 138	35065-28-2		176.581	214.274	199.487	226.125	244.795	269.01	60.7638	78.634	246.487	250.459	244.906	237.559	247.642	61.911	60.3981	30.1387	27.6995	32.8647	12.3971	29.129	29.2112	27.4727	27.1591	31.1771	30.398	23.4195	24.8137	21.1525	21.975	26.9747	25.8102	26.4453	24.3305	77.5701	59.0686	60.7947	60.7175	63.4421	55.6881	53.5548	58.4935	37.6283	36.2665	37.2577	36.1117	32.4917	36.2704
PCB 149	38380-04-0		126.165	138.584	129.979	150.456	181.892	185.545	55.5381	71.2862	188.358	181.789	181.986	165.264	175.67	53.8062	74.1284	6.11612	4.80821	6.83389	10.5069	6.82571	7.86414	9.86617	5.61258	7.45414	7.14611	6.29071	6.77133	3.48331	4.72344	6.50982	6.60983	6.69168	5.75956	87.6194	49.5062	71.4014	87.256	73.0925	n.d.	53.0789	76.0826	41.6678	42.9559	42.6029	40.3147	35.8389	39.5541
PCB 153	35065-27-1		400.852	447.431	421.007	474.282	558.383	568.895	112.594	135.895	535.672	527.103	526.725	510.183	516.004	111.449	104.527	51.695	49.6279	52.3948	54.3134	52.9648	50.9719	39.0394	41.292	50.4095	48.7924	38.7578	39.5162	33.9269	34.0322	45.8732	44.2097	44.7308	39.935	150.298	147.071	133.105	140.144	146.106	123.147	91.4561	95.451	70.0114	69.5439	73.0659	71.4643	63.5017	67.263
PCB 170	35065-30-6		24.8405	27.6498	25.395	26.8204	29.8502	30.9888	6.35531	7.66195	29.61	32.9273	30.201	33.9223	34.657	5.28576	5.73195	n.d.	n.d.	n.d.	1.61485	n.d.	2.44929	3.51196	1.43527	2.3074	1.53915	1.8024	3.17602	n.d.	n.d.	3.66636	3.98263	3.8246	3.45361	1.84046	n.d.	n.d.	1.62175	2.69905	2.00705	n.d.	3.36127	n.d.	1.89478	1.59024	2.07064	0.955383	1.34333
PCB 180	35065-29-3		56.2296	63.2289	58.8999	64.6011	71.9778	76.1993	14.5451	14.5168	66.895	65.2192	66.3443	64.4868	66.3168	10.9187	9.21791	9.635	10.2407	9.94575	10.7507	10.553	10.2606	8.95322	8.01475	11.534	10.0923	8.44143	7.89525	6.02299	6.16131	10.0607	8.84331	9.07563	8.1493	17.2196	12.911	14.6553	16.2874	14.0757	12.4202	11.1307	8.79061	8.08568	8.27204	8.92582	8.56203	8.88416	8.96146
PCB 194	35694-08-7		5.67472	7.26492	6.89966	9.08194	9.75827	10.0072	n.d.	n.d.	n.d.	n.d.	n.d.	n.d.	n.d.	n.d.	n.d.	n.d.	n.d.	n.d.	n.d.	n.d.	n.d.	n.d.	n.d.	n.d.	n.d.	n.d.	n.d.	n.d.	n.d.	n.d.	n.d.	n.d.	n.d.	n.d.	n.d.	n.d.	n.d.	n.d.	n.d.	n.d.	n.d.	n.d.	n.d.	n.d.	n.d.	n.d.	n.d.
PCB 209	2051-24-3		2.102	2.12989	4.33614	5.08371	n.d.	5.12207	n.d.	n.d.	n.d.	n.d.	n.d.	1.5761	n.d.	n.d.	n.d.	n.d.	n.d.	n.d.	n.d.	n.d.	n.d.	n.d.	n.d.	n.d.	n.d.	n.d.	n.d.	n.d.	n.d.	n.d.	n.d.	n.d.	n.d.	n.d.	n.d.	n.d.	n.d.	n.d.	n.d.	n.d.	n.d.	n.d.	n.d.	n.d.	n.d.	n.d.	n.d.
Acenaphthene	83-32-9		n.d.	n.d.	n.d.	n.d.	8.14651	9.66578	n.d.	9.42969	n.d.	8.21226	9.66594	6.79672	7.79488	23.1388	17.085	n.d.	n.d.	15.4689	n.d.	n.d.	5.71593	8.76571	n.d.	n.d.	n.d.	n.d.	n.d.	n.d.	n.d.	n.d.	122.209	125.315	85.9868	n.d.	n.d.	14.7439	n.d.	n.d.	19.5031	14.5699	13.3941	8.46631	8.60599	6.71027	5.56798	7.27987	5.38165
Acenaphthylene	208-96-8		7.22094	5.7655	n.d.	5.67647	4.75869	6.28183	n.d.	0.966215	n.d.	25.9556	27.0016	19.3868	19.512	0.940713	0.956352	1.7543	n.d.	0.882704	n.d.	0.741265	1.5359	0.849611	1.83118	0.72975	n.d.	2.07571	n.d.	1.62267	1.46438	2.80379	2.69659	2.05047	2.3409	1.99712	n.d.	1.86218	2.16759	1.31209	n.d.	n.d.	0.490663	n.d.	n.d.	1.77305	2.50217	4.26873	2.25395
Anthracene	120-12-7		5.40771	5.04851	6.23663	6.8944	8.03935	10.2326	n.d.	0.359866	0.763248	0.575734	0.998951	0.930651	0.556745	0.448388	0.3608	n.d.	n.d.	0.321001	0.227437	0.22407	0.337055	n.d.	0.393625	n.d.	n.d.	0.147749	n.d.	0.210329	n.d.	n.d.	n.d.	0.35794	0.125518	n.d.	n.d.	3.33039	2.33176	2.87176	3.71129	1.24725	n.d.	n.d.	n.d.	0.251302	0.121431	0.114698	0.474085
Benz[a]anthracene	56-55-3		n.d.	n.d.	n.d.	n.d.	n.d.	n.d.	n.d.	n.d.	n.d.	n.d.	n.d.	n.d.	n.d.	n.d.	n.d.	n.d.	n.d.	n.d.	n.d.	n.d.	n.d.	n.d.	n.d.	n.d.	n.d.	n.d.	n.d.	n.d.	n.d.	n.d.	n.d.	n.d.	n.d.	n.d.	n.d.	n.d.	n.d.	n.d.	n.d.	n.d.	n.d.	n.d.	n.d.	n.d.	n.d.	n.d.	n.d.
Benzo[b]fluorene	243-17-4		n.d.	n.d.	n.d.	n.d.	n.d.	n.d.	n.d.	0.528254	n.d.	n.d.	n.d.	n.d.	n.d.	n.d.	1.02862	n.d.	n.d.	n.d.	n.d.	n.d.	n.d.	1.07137	1.13713	n.d.	n.d.	n.d.	n.d.	n.d.	n.d.	0.764148	0.681744	0.568926	0.269446	n.d.	n.d.	n.d.	n.d.	n.d.	n.d.	n.d.	n.d.	0.800862	n.d.	0.485954	0.523229	n.d.	n.d.
Benzo[e]pyrene	192-97-2		n.d.	n.d.	n.d.	n.d.	n.d.	n.d.	n.d.	n.d.	n.d.	n.d.	n.d.	n.d.	n.d.	n.d.	n.d.	n.d.	n.d.	n.d.	n.d.	n.d.	n.d.	n.d.	n.d.	n.d.	n.d.	n.d.	n.d.	n.d.	n.d.	n.d.	n.d.	n.d.	n.d.	n.d.	n.d.	n.d.	n.d.	n.d.	n.d.	n.d.	n.d.	n.d.	n.d.	n.d.	0.323532	n.d.	n.d.
Cyclopenta[cd]pyrene	27208-37-3		0.25831	0.279573	0.4146	0.52642	0.325141	0.253625	n.d.	0.121168	n.d.	n.d.	n.d.	n.d.	n.d.	n.d.	0.255652	n.d.	n.d.	n.d.	n.d.	n.d.	n.d.	0.226535	n.d.	n.d.	n.d.	n.d.	n.d.	n.d.	n.d.	n.d.	n.d.	0.213587	0.0100201	n.d.	n.d.	n.d.	n.d.	n.d.	n.d.	0.924369	0.502531	n.d.	n.d.	0.00466604	0.470515	n.d.	n.d.
4H-Cyclopenta[def]phenanthrene	203-64-5		n.d.	n.d.	n.d.	n.d.	n.d.	n.d.	n.d.	0.0760319	n.d.	n.d.	n.d.	n.d.	n.d.	n.d.	n.d.	n.d.	n.d.	4.31406	n.d.	5.66112	9.49385	0.269977	0.362949	n.d.	n.d.	n.d.	n.d.	0.0522059	0.015905	1.57451	n.d.	0.164307	0.208905	7.4328	n.d.	6.10519	4.59803	6.07461	n.d.	n.d.	0.18716	0.315643	0.461676	0.43213	0.12573	n.d.	0.264196
Fluoranthene	206-44-0		n.d.	n.d.	0.897401	n.d.	n.d.	n.d.	n.d.	0.265309	n.d.	n.d.	n.d.	0.0272198	n.d.	0.38056	0.455656	n.d.	n.d.	n.d.	n.d.	n.d.	n.d.	0.426822	0.556465	n.d.	n.d.	4.28096	n.d.	3.27474	4.33738	n.d.	n.d.	n.d.	0.170858	0.208997	n.d.	0.443163	0.369117	n.d.	0.697086	n.d.	0.688028	n.d.	n.d.	0.629066	1.0084	1.21101	0.434644
Fluorene	86-73-7		27.5238	22.997	23.0132	12.4432	25.7043	19.8434	n.d.	1.76807	n.d.	22.1692	22.4598	18.5052	18.2098	2.07734	2.19943	0.961009	0.575583	1.70079	n.d.	2.44886	5.47373	2.01974	n.d.	n.d.	n.d.	2.80537	n.d.	2.82354	4.14129	24.6286	15.7395	15.7848	14.0497	n.d.	n.d.	2.34532	2.61907	2.12975	n.d.	n.d.	1.04664	31.1342	27.2506	21.9339	20.3434	17.7435	16.8085
Phenanthrene	85-01-8		16.8739	7.64091	n.d.	17.4267	16.488	21.4751	n.d.	3.40514	n.d.	8.27313	9.34621	9.26025	7.72502	4.04347	3.41425	n.d.	n.d.	1.11437	1.08023	2.12582	1.21782	2.6068	n.d.	3.15803	2.1863	2.47964	n.d.	7.11553	6.48659	16.2689	7.46546	12.0765	10.7369	6.86568	n.d.	n.d.	4.51694	n.d.	7.46808	n.d.	2.66031	8.59168	n.d.	10.0832	9.74562	8.99013	9.98013
Pyrene	129-00-0		n.d.	n.d.	n.d.	n.d.	n.d.	n.d.	n.d.	n.d.	n.d.	n.d.	n.d.	n.d.	n.d.	0.00513252	n.d.	n.d.	n.d.	n.d.	n.d.	n.d.	n.d.	0.32122	0.264361	n.d.	n.d.	11.6944	n.d.	7.70514	10.62	n.d.	n.d.	0.186327	0.0862569	3.30639	n.d.	n.d.	0.681654	n.d.	1.85424	n.d.	n.d.	n.d.	n.d.	n.d.	0.397167	0.0298359	n.d.
9-vinylanthracene	2444-68-0		n.d.	n.d.	n.d.	n.d.	n.d.	n.d.	n.d.	n.d.	n.d.	n.d.	n.d.	n.d.	n.d.	n.d.	n.d.	n.d.	n.d.	n.d.	n.d.	n.d.	n.d.	0.34953	0.451931	n.d.	n.d.	n.d.	n.d.	0.16136	n.d.	n.d.	n.d.	n.d.	n.d.	n.d.	n.d.	n.d.	n.d.	n.d.	n.d.	2.64656	n.d.	n.d.	n.d.	n.d.	n.d.	n.d.	n.d.
4,4'-DDE	72-55-9		116.92	133.931	133.215	160.525	213.687	209.201	n.d.	89.7356	197.02	182.29	185.774	159.67	174.892	78.5534	118.018	86.2104	100.819	66.1218	84.4853	66.355	65.0101	109.241	89.6491	55.1509	59.0993	45.1275	56.7375	39.7706	39.6331	69.9761	61.3443	60.443	52.7963	164.238	87.9524	119.449	139.83	123.263	70.8435	137.459	232.921	76.86	80.5208	73.5386	69.5582	64.1199	65.173
4,4'-DDD	72-54-8		17.6702	19.2719	18.5775	19.4861	20.5756	20.007	n.d.	4.17381	16.0312	16.388	16.6327	18.3295	19.2919	4.40444	3.44073	3.73722	3.01188	3.3724	3.94787	4.09511	4.52683	1.70469	2.09369	3.91468	2.47736	3.09078	3.20116	2.92379	2.82293	2.39632	2.87993	3.11892	2.9672	7.55548	7.46593	8.50506	8.17577	8.92483	9.4347	5.0874	5.10313	3.31695	3.27698	3.79288	3.72964	3.9896	3.88347
4,4'-DDT	50-29-3		n.d.	n.d.	n.d.	n.d.	n.d.	n.d.	n.d.	14.3043	n.d.	n.d.	n.d.	n.d.	n.d.	11.3213	11.2931	n.d.	n.d.	n.d.	n.d.	n.d.	n.d.	13.4942	10.0873	n.d.	1.95563	1.35061	2.15661	1.66061	1.56132	n.d.	n.d.	n.d.	n.d.	n.d.	n.d.	n.d.	n.d.	n.d.	n.d.	n.d.	24.7848	n.d.	n.d.	n.d.	n.d.	n.d.	n.d.
4,4'-DDMU	1022-22-6		n.d.	n.d.	n.d.	n.d.	n.d.	n.d.	n.d.	n.d.	n.d.	n.d.	n.d.	n.d.	n.d.	n.d.	n.d.	n.d.	n.d.	n.d.	n.d.	n.d.	n.d.	n.d.	n.d.	n.d.	n.d.	n.d.	n.d.	n.d.	n.d.	n.d.	n.d.	n.d.	n.d.	n.d.	n.d.	n.d.	n.d.	n.d.	n.d.	n.d.	n.d.	n.d.	n.d.	n.d.	n.d.	n.d.	n.d.
Dicofol	115-32-2		n.d.	n.d.	n.d.	n.d.	n.d.	n.d.	n.d.	n.d.	n.d.	n.d.	n.d.	n.d.	n.d.	n.d.	n.d.	n.d.	n.d.	n.d.	n.d.	n.d.	n.d.	n.d.	n.d.	n.d.	n.d.	n.d.	n.d.	n.d.	n.d.	n.d.	n.d.	n.d.	n.d.	n.d.	n.d.	n.d.	n.d.	n.d.	n.d.	n.d.	n.d.	n.d.	n.d.	n.d.	n.d.	n.d.	n.d.
Dieldrin	60-57-1		n.d.	n.d.	111.41	127.795	252.808	217.876	n.d.	68.2867	n.d.	50.7659	53.5837	47.0068	52.9238	35.8114	52.2931	n.d.	n.d.	n.d.	n.d.	n.d.	n.d.	n.d.	n.d.	n.d.	n.d.	n.d.	n.d.	n.d.	n.d.	n.d.	n.d.	n.d.	n.d.	n.d.	n.d.	n.d.	39.8685	38.5789	n.d.	50.3967	62.4669	n.d.	n.d.	n.d.	n.d.	n.d.	n.d.
alpha-Endosulfan	959-98-8		n.d.	n.d.	n.d.	n.d.	10.5521	9.50197	n.d.	n.d.	n.d.	n.d.	n.d.	n.d.	n.d.	n.d.	n.d.	n.d.	n.d.	n.d.	n.d.	n.d.	n.d.	n.d.	n.d.	n.d.	n.d.	n.d.	n.d.	n.d.	n.d.	n.d.	n.d.	n.d.	n.d.	n.d.	n.d.	n.d.	n.d.	n.d.	n.d.	n.d.	n.d.	n.d.	n.d.	n.d.	n.d.	n.d.	n.d.
Heptachlor-endo-epoxide	28044-83-9		n.d.	n.d.	n.d.	n.d.	n.d.	n.d.	n.d.	n.d.	n.d.	n.d.	n.d.	n.d.	n.d.	n.d.	n.d.	n.d.	n.d.	n.d.	n.d.	n.d.	n.d.	n.d.	n.d.	n.d.	n.d.	n.d.	n.d.	n.d.	n.d.	n.d.	n.d.	n.d.	n.d.	n.d.	n.d.	n.d.	n.d.	n.d.	n.d.	n.d.	n.d.	n.d.	n.d.	n.d.	n.d.	n.d.	n.d.
α-HCH	319-84-6		n.d.	0.731498	0.295098	0.394594	1.36851	1.02333	n.d.	n.d.	n.d.	n.d.	n.d.	n.d.	n.d.	n.d.	n.d.	n.d.	n.d.	n.d.	n.d.	n.d.	n.d.	n.d.	n.d.	n.d.	n.d.	n.d.	n.d.	n.d.	n.d.	n.d.	n.d.	n.d.	n.d.	n.d.	n.d.	n.d.	n.d.	n.d.	2.46489	n.d.	n.d.	n.d.	n.d.	n.d.	n.d.	n.d.	n.d.
β- HCH	319-85-7		n.d.	0.0787846	0.0877059	n.d.	n.d.	n.d.	n.d.	n.d.	n.d.	n.d.	n.d.	n.d.	n.d.	n.d.	n.d.	n.d.	n.d.	n.d.	n.d.	n.d.	n.d.	n.d.	n.d.	n.d.	n.d.	n.d.	n.d.	n.d.	n.d.	n.d.	n.d.	n.d.	n.d.	n.d.	0.338045	n.d.	n.d.	n.d.	0.160179	n.d.	n.d.	n.d.	n.d.	n.d.	n.d.	n.d.	n.d.
γ-HCH	58-89-9		n.d.	n.d.	n.d.	n.d.	n.d.	n.d.	n.d.	n.d.	n.d.	n.d.	n.d.	n.d.	n.d.	n.d.	n.d.	n.d.	n.d.	n.d.	n.d.	n.d.	n.d.	n.d.	n.d.	n.d.	n.d.	0.409159	n.d.	n.d.	n.d.	n.d.	n.d.	n.d.	n.d.	n.d.	n.d.	n.d.	n.d.	n.d.	0.211783	n.d.	n.d.	n.d.	n.d.	n.d.	n.d.	n.d.	n.d.
δ-HCH	319-86-8		n.d.	n.d.	n.d.	n.d.	n.d.	n.d.	n.d.	n.d.	n.d.	n.d.	n.d.	n.d.	n.d.	n.d.	n.d.	n.d.	n.d.	n.d.	n.d.	n.d.	n.d.	n.d.	n.d.	n.d.	n.d.	n.d.	n.d.	n.d.	n.d.	n.d.	n.d.	n.d.	n.d.	n.d.	n.d.	n.d.	n.d.	n.d.	n.d.	n.d.	n.d.	n.d.	n.d.	n.d.	n.d.	n.d.	n.d.
BDE-47	5436-43-1		0.747059	n.d.	0.652439	n.d.	0.696551	n.d.	n.d.	n.d.	n.d.	1.36977	n.d.	1.63497	1.42846	n.d.	n.d.	n.d.	n.d.	n.d.	n.d.	n.d.	n.d.	n.d.	n.d.	n.d.	n.d.	n.d.	n.d.	n.d.	n.d.	n.d.	n.d.	n.d.	n.d.	n.d.	n.d.	n.d.	n.d.	n.d.	n.d.	n.d.	n.d.	n.d.	n.d.	n.d.	n.d.	n.d.	n.d.
BDE-99	60348-60-9		n.d.	n.d.	n.d.	n.d.	n.d.	n.d.	n.d.	n.d.	n.d.	n.d.	n.d.	n.d.	n.d.	n.d.	n.d.	n.d.	n.d.	n.d.	n.d.	n.d.	n.d.	n.d.	n.d.	n.d.	n.d.	n.d.	n.d.	n.d.	n.d.	n.d.	n.d.	n.d.	n.d.	n.d.	n.d.	n.d.	n.d.	n.d.	n.d.	n.d.	n.d.	n.d.	n.d.	n.d.	n.d.	n.d.	n.d.
Allethrin	584-79-2		n.d.	n.d.	n.d.	n.d.	n.d.	n.d.	n.d.	n.d.	n.d.	n.d.	n.d.	n.d.	n.d.	n.d.	n.d.	n.d.	n.d.	n.d.	n.d.	n.d.	n.d.	n.d.	n.d.	n.d.	n.d.	n.d.	n.d.	n.d.	n.d.	n.d.	n.d.	n.d.	n.d.	n.d.	n.d.	n.d.	n.d.	n.d.	n.d.	n.d.	n.d.	n.d.	n.d.	n.d.	n.d.	n.d.	n.d.
Bifenthrin	82657-04-3		n.d.	n.d.	n.d.	n.d.	n.d.	n.d.	n.d.	n.d.	n.d.	n.d.	n.d.	n.d.	n.d.	n.d.	n.d.	n.d.	n.d.	n.d.	n.d.	n.d.	n.d.	0.935436	0.982528	n.d.	n.d.	n.d.	n.d.	n.d.	n.d.	n.d.	n.d.	n.d.	n.d.	n.d.	n.d.	n.d.	n.d.	n.d.	n.d.	n.d.	n.d.	n.d.	n.d.	n.d.	n.d.	n.d.	n.d.
Cyhalothrin	91465-08-6		n.d.	n.d.	n.d.	n.d.	n.d.	n.d.	n.d.	n.d.	n.d.	n.d.	n.d.	n.d.	n.d.	n.d.	n.d.	n.d.	n.d.	n.d.	n.d.	n.d.	n.d.	n.d.	n.d.	n.d.	n.d.	n.d.	n.d.	n.d.	n.d.	n.d.	n.d.	n.d.	n.d.	n.d.	n.d.	n.d.	n.d.	n.d.	n.d.	n.d.	n.d.	n.d.	n.d.	n.d.	n.d.	n.d.	n.d.
Etofenprox	80844-07-1		n.d.	n.d.	1.1149	2.03624	n.d.	2.96843	n.d.	25.9393	n.d.	n.d.	n.d.	n.d.	n.d.	21.0748	18.2574	n.d.	n.d.	n.d.	n.d.	n.d.	n.d.	n.d.	95.0045	n.d.	n.d.	n.d.	n.d.	n.d.	n.d.	n.d.	n.d.	n.d.	n.d.	n.d.	n.d.	n.d.	n.d.	n.d.	n.d.	n.d.	9.2382	n.d.	n.d.	n.d.	n.d.	n.d.	n.d.
Permethrin	52645-53-1		n.d.	n.d.	n.d.	n.d.	n.d.	n.d.	n.d.	n.d.	n.d.	n.d.	n.d.	n.d.	n.d.	n.d.	n.d.	n.d.	n.d.	n.d.	n.d.	n.d.	n.d.	n.d.	n.d.	n.d.	n.d.	n.d.	n.d.	n.d.	n.d.	n.d.	n.d.	n.d.	n.d.	n.d.	n.d.	n.d.	n.d.	n.d.	n.d.	n.d.	n.d.	n.d.	n.d.	n.d.	n.d.	n.d.	n.d.
Prallethrin	23031-36-9		n.d.	n.d.	n.d.	n.d.	n.d.	n.d.	n.d.	n.d.	n.d.	n.d.	n.d.	n.d.	n.d.	n.d.	n.d.	n.d.	n.d.	n.d.	n.d.	n.d.	n.d.	n.d.	n.d.	n.d.	n.d.	n.d.	n.d.	n.d.	n.d.	n.d.	n.d.	n.d.	n.d.	n.d.	n.d.	n.d.	n.d.	n.d.	n.d.	n.d.	n.d.	n.d.	n.d.	n.d.	n.d.	n.d.	n.d.
Transfluthrin	118712-89-3		n.d.	n.d.	n.d.	n.d.	n.d.	n.d.	n.d.	n.d.	n.d.	n.d.	n.d.	n.d.	n.d.	n.d.	n.d.	n.d.	n.d.	n.d.	n.d.	n.d.	n.d.	n.d.	n.d.	n.d.	n.d.	n.d.	n.d.	n.d.	n.d.	n.d.	n.d.	n.d.	n.d.	n.d.	n.d.	n.d.	n.d.	n.d.	n.d.	n.d.	n.d.	n.d.	n.d.	n.d.	n.d.	n.d.	n.d.
Hexachlorobenzene	118-74-1		n.d.	n.d.	n.d.	n.d.	n.d.	n.d.	n.d.	34.7898	26.6561	44.0795	42.3881	45.4617	48.0182	20.5959	16.8589	n.d.	n.d.	n.d.	n.d.	n.d.	n.d.	n.d.	n.d.	n.d.	n.d.	n.d.	n.d.	n.d.	n.d.	n.d.	n.d.	n.d.	n.d.	63.6063	58.8639	62.1808	66.1389	70.5745	68.0659	34.6198	28.6711	21.9657	n.d.	30.8531	32.0586	38.8125	36.1925
Pentachlorobenzene	608-93-5		n.d.	n.d.	n.d.	n.d.	n.d.	n.d.	n.d.	n.d.	n.d.	n.d.	n.d.	n.d.	n.d.	n.d.	n.d.	n.d.	n.d.	n.d.	n.d.	n.d.	n.d.	n.d.	n.d.	n.d.	n.d.	n.d.	n.d.	n.d.	n.d.	n.d.	n.d.	n.d.	n.d.	n.d.	n.d.	n.d.	n.d.	n.d.	n.d.	n.d.	n.d.	n.d.	n.d.	n.d.	n.d.	n.d.	n.d.
Galaxolide	1222-05-5		98.1867	99.5989	94.7688	115.804	n.d.	128.399	n.d.	11.1283	n.d.	20.3667	12.4014	24.6881	20.56	22.9979	22.1486	n.d.	n.d.	n.d.	n.d.	n.d.	n.d.	2.79943	4.32854	n.d.	n.d.	n.d.	n.d.	n.d.	n.d.	n.d.	n.d.	n.d.	1.91843	n.d.	n.d.	n.d.	5.82034	6.52773	8.72092	19.6177	16.3517	n.d.	n.d.	n.d.	n.d.	12.7717	3.44524
Tonalide	21145-77-7		2.25964	2.27766	n.d.	5.3226	n.d.	3.73384	n.d.	n.d.	n.d.	n.d.	n.d.	n.d.	n.d.	n.d.	n.d.	n.d.	n.d.	n.d.	n.d.	n.d.	n.d.	n.d.	n.d.	n.d.	n.d.	n.d.	n.d.	n.d.	n.d.	n.d.	n.d.	n.d.	n.d.	2.83925	n.d.	2.1739	2.61834	3.44338	3.64272	0.157529	n.d.	n.d.	n.d.	n.d.	n.d.	n.d.	n.d.
2-Acetonaphthone	93-08-3		n.d.	n.d.	n.d.	n.d.	n.d.	n.d.	n.d.	n.d.	1.67448	1.81853	0.955198	1.3105	0.745553	0.173698	0.317383	n.d.	n.d.	n.d.	n.d.	n.d.	n.d.	0.393697	0.803628	n.d.	n.d.	n.d.	n.d.	n.d.	n.d.	1.39152	1.73337	1.31029	1.90536	n.d.	n.d.	n.d.	n.d.	n.d.	n.d.	1.77387	0.195197	2.56639	2.04571	1.87247	1.51461	1.78602	1.69459
Benzyl benzoate	120-51-4		38.8517	43.8964	38.9158	45.8119	n.d.	n.d.	n.d.	n.d.	n.d.	n.d.	n.d.	n.d.	n.d.	n.d.	n.d.	n.d.	n.d.	n.d.	n.d.	n.d.	n.d.	n.d.	n.d.	n.d.	n.d.	n.d.	n.d.	n.d.	n.d.	n.d.	n.d.	n.d.	n.d.	n.d.	n.d.	n.d.	n.d.	n.d.	n.d.	n.d.	n.d.	n.d.	n.d.	n.d.	n.d.	n.d.	n.d.
p-Benzyldiphenyl	613-42-3		0.992671	n.d.	1.13498	1.3738	1.66523	1.86144	n.d.	0.454833	n.d.	0.55305	0.561824	0.548471	0.623791	n.d.	n.d.	n.d.	n.d.	n.d.	n.d.	n.d.	n.d.	n.d.	n.d.	n.d.	n.d.	n.d.	n.d.	n.d.	n.d.	n.d.	n.d.	n.d.	n.d.	n.d.	n.d.	n.d.	n.d.	n.d.	n.d.	n.d.	n.d.	n.d.	n.d.	n.d.	n.d.	0.230835	n.d.
Benzyl-2-naphthylether	613-62-7		n.d.	n.d.	n.d.	n.d.	n.d.	n.d.	n.d.	0.519169	n.d.	n.d.	n.d.	57.0374	n.d.	4.07872	2.83766	n.d.	n.d.	n.d.	n.d.	n.d.	n.d.	0.931845	3.73513	1.54845	1.3813	2.03271	1.03077	n.d.	1.61499	n.d.	0.762717	n.d.	0.853502	n.d.	n.d.	n.d.	n.d.	n.d.	n.d.	n.d.	n.d.	15.4946	25.1432	23.9712	19.5833	n.d.	14.5776
Bis(4-chlorophenyl)sulfone	80-07-9		4.94439	5.7871	5.86735	6.65046	n.d.	8.57845	n.d.	n.d.	4.21519	4.02601	3.90591	4.32982	4.66459	n.d.	33.9125	n.d.	n.d.	n.d.	n.d.	n.d.	n.d.	n.d.	n.d.	n.d.	n.d.	n.d.	n.d.	n.d.	n.d.	n.d.	130.255	125.877	96.3008	15.3501	n.d.	14.3441	13.9896	22.4083	10.6188	n.d.	55.2793	8.05675	8.40479	9.08776	7.93801	8.31083	9.82382
Dibutylhydroxytoluene	128-37-0		n.d.	n.d.	n.d.	n.d.	n.d.	n.d.	n.d.	32.9872	n.d.	n.d.	n.d.	n.d.	n.d.	n.d.	180.906	n.d.	n.d.	n.d.	n.d.	n.d.	n.d.	101.868	139.743	n.d.	n.d.	n.d.	n.d.	n.d.	n.d.	n.d.	n.d.	n.d.	n.d.	n.d.	n.d.	n.d.	n.d.	n.d.	n.d.	n.d.	149.599	n.d.	n.d.	n.d.	n.d.	n.d.	n.d.
2,6-Diisopropylnaphthalene	24157-81-1		n.d.	n.d.	n.d.	n.d.	n.d.	n.d.	n.d.	20.7128	n.d.	n.d.	n.d.	n.d.	n.d.	n.d.	13.9135	12.9461	n.d.	21.1677	9.49991	3.95697	9.84028	n.d.	10.0042	7.03861	n.d.	11.8321	9.13453	5.69452	6.36737	n.d.	n.d.	n.d.	n.d.	n.d.	n.d.	n.d.	n.d.	13.8828	10.3036	n.d.	n.d.	n.d.	n.d.	n.d.	n.d.	n.d.	n.d.
DMPA	24650-42-8		n.d.	n.d.	n.d.	n.d.	n.d.	n.d.	n.d.	n.d.	4.44388	5.44936	4.54331	4.33685	2.68785	9.53001	n.d.	n.d.	n.d.	n.d.	n.d.	n.d.	n.d.	n.d.	9.16107	n.d.	n.d.	n.d.	n.d.	n.d.	n.d.	n.d.	12.4718	10.4249	5.89686	n.d.	n.d.	n.d.	n.d.	n.d.	n.d.	n.d.	n.d.	3.20198	n.d.	1.9589	3.57938	5.16079	3.36014
Diphenyl sulfone	127-63-9		0.380813	0.474071	0.504208	0.709032	n.d.	n.d.	n.d.	n.d.	n.d.	n.d.	n.d.	n.d.	n.d.	0.218356	1.1436	n.d.	n.d.	2.96033	n.d.	4.8734	5.7792	1.64804	n.d.	n.d.	n.d.	n.d.	n.d.	0.102442	n.d.	n.d.	28.5624	27.2021	20.0957	n.d.	3.92403	n.d.	1.17614	1.86041	4.60375	1.78911	3.37913	n.d.	n.d.	0.697966	0.767412	0.884025	0.815207
Diphenylmethane	101-81-5		n.d.	n.d.	n.d.	n.d.	n.d.	n.d.	n.d.	0.473023	n.d.	n.d.	n.d.	0.350768	n.d.	0.60623	0.800597	n.d.	n.d.	0.367055	0.274959	n.d.	1.57953	0.826639	1.20741	0.778035	n.d.	0.677388	n.d.	2.04254	2.73517	1.0212	0.889806	1.39299	0.770691	n.d.	23.1677	n.d.	0.702079	0.364751	2.93189	n.d.	0.716267	n.d.	n.d.	1.48757	0.757733	2.08502	1.32134
2,6-di-tert-Butylphenol	128-39-2		n.d.	n.d.	n.d.	n.d.	n.d.	n.d.	n.d.	n.d.	n.d.	n.d.	n.d.	n.d.	n.d.	n.d.	n.d.	n.d.	n.d.	n.d.	n.d.	n.d.	n.d.	n.d.	20.0551	n.d.	n.d.	n.d.	n.d.	2.15709	4.07117	n.d.	n.d.	25.4419	7.85328	n.d.	n.d.	n.d.	n.d.	n.d.	8.42007	n.d.	n.d.	n.d.	n.d.	n.d.	n.d.	n.d.	n.d.
Ethylene glycol diphenylether	104-66-5		n.d.	n.d.	2.24267	1.62959	n.d.	4.99848	n.d.	2.01661	25.7692	24.997	24.0122	19.83	25.4907	n.d.	3.31642	n.d.	n.d.	8.3103	n.d.	20.6249	14.2243	3.1148	n.d.	n.d.	n.d.	36.0516	23.6277	52.5333	47.6889	62.5303	69.0231	64.2535	75.2578	n.d.	n.d.	n.d.	n.d.	0.63071	4.01161	n.d.	3.63821	38.2567	42.3198	57.5389	48.7974	46.7377	47.8136
Homosalate	118-56-9		20.9193	33.4671	27.5687	32.607	n.d.	32.4039	n.d.	n.d.	n.d.	n.d.	n.d.	n.d.	n.d.	n.d.	1.91332	n.d.	n.d.	n.d.	n.d.	n.d.	n.d.	n.d.	2.01278	n.d.	n.d.	n.d.	n.d.	41.5514	19.1046	n.d.	n.d.	n.d.	n.d.	n.d.	n.d.	n.d.	n.d.	n.d.	9.04638	n.d.	n.d.	n.d.	n.d.	n.d.	n.d.	n.d.	n.d.
Enzacamene	36861-47-9		n.d.	n.d.	n.d.	n.d.	n.d.	n.d.	n.d.	2.10223	n.d.	n.d.	n.d.	n.d.	n.d.	2.24352	3.40991	n.d.	n.d.	n.d.	n.d.	n.d.	n.d.	n.d.	n.d.	n.d.	n.d.	n.d.	n.d.	n.d.	n.d.	10.3304	8.7006	n.d.	6.34325	n.d.	n.d.	n.d.	n.d.	n.d.	n.d.	5.25913	5.49518	n.d.	n.d.	n.d.	n.d.	n.d.	n.d.
trans-alpha-Methylstilbene	103-30-0/833-81-8		9.10222	7.96458	10.316	7.11846	6.45227	6.40673	n.d.	n.d.	n.d.	n.d.	n.d.	n.d.	n.d.	n.d.	n.d.	n.d.	n.d.	n.d.	n.d.	n.d.	n.d.	n.d.	n.d.	n.d.	n.d.	n.d.	n.d.	3.33333	n.d.	n.d.	n.d.	n.d.	n.d.	n.d.	n.d.	2.60686	n.d.	n.d.	2.59296	n.d.	n.d.	n.d.	n.d.	n.d.	n.d.	1.53795	1.98249
Methyl phenyl sulfone	3112-85-4		n.d.	n.d.	n.d.	n.d.	n.d.	n.d.	n.d.	n.d.	n.d.	n.d.	n.d.	n.d.	n.d.	n.d.	n.d.	n.d.	n.d.	n.d.	n.d.	n.d.	n.d.	n.d.	n.d.	n.d.	n.d.	n.d.	n.d.	n.d.	n.d.	n.d.	n.d.	n.d.	n.d.	n.d.	n.d.	5.63713	n.d.	n.d.	8.76383	n.d.	n.d.	n.d.	n.d.	n.d.	n.d.	n.d.	n.d.
1-Phenylnaphthalene	605-02-7		0.236327	0.685857	1.27915	0.372294	0.501623	0.950904	n.d.	n.d.	n.d.	n.d.	n.d.	0.148105	n.d.	n.d.	n.d.	n.d.	n.d.	n.d.	n.d.	n.d.	n.d.	n.d.	0.702284	n.d.	n.d.	1.20382	n.d.	0.644106	0.618393	n.d.	n.d.	n.d.	n.d.	n.d.	n.d.	n.d.	n.d.	n.d.	n.d.	n.d.	0.682131	n.d.	n.d.	n.d.	n.d.	n.d.	n.d.
cis-Stilbene	645-49-8		n.d.	n.d.	n.d.	n.d.	n.d.	n.d.	n.d.	n.d.	n.d.	n.d.	n.d.	n.d.	n.d.	n.d.	n.d.	n.d.	n.d.	n.d.	n.d.	n.d.	n.d.	n.d.	n.d.	n.d.	n.d.	n.d.	n.d.	n.d.	n.d.	n.d.	n.d.	n.d.	n.d.	n.d.	n.d.	n.d.	n.d.	n.d.	n.d.	n.d.	n.d.	n.d.	n.d.	0.0371469	0.031626	0.414993	0.00651342
alpha-Tocopherol acetate	7695-91-2		n.d.	n.d.	n.d.	n.d.	n.d.	n.d.	n.d.	n.d.	n.d.	n.d.	n.d.	n.d.	n.d.	n.d.	n.d.	n.d.	n.d.	n.d.	n.d.	n.d.	n.d.	n.d.	n.d.	n.d.	n.d.	n.d.	n.d.	n.d.	n.d.	n.d.	n.d.	n.d.	n.d.	n.d.	n.d.	n.d.	n.d.	n.d.	n.d.	n.d.	n.d.	n.d.	n.d.	5.00062	6.30409	n.d.	7.46754
none detected:
Benzo[a]pyrene	50-32-8		n.d.	n.d.	n.d.	n.d.	n.d.	n.d.	n.d.	n.d.	n.d.	n.d.	n.d.	n.d.	n.d.	n.d.	n.d.	n.d.	n.d.	n.d.	n.d.	n.d.	n.d.	n.d.	n.d.	n.d.	n.d.	n.d.	n.d.	n.d.	n.d.	n.d.	n.d.	n.d.	n.d.	n.d.	n.d.	n.d.	n.d.	n.d.	n.d.	n.d.	n.d.	n.d.	n.d.	n.d.	n.d.	n.d.	n.d.
Benzo[b]fluoranthene	205-99-2		n.d.	n.d.	n.d.	n.d.	n.d.	n.d.	n.d.	n.d.	n.d.	n.d.	n.d.	n.d.	n.d.	n.d.	n.d.	n.d.	n.d.	n.d.	n.d.	n.d.	n.d.	n.d.	n.d.	n.d.	n.d.	n.d.	n.d.	n.d.	n.d.	n.d.	n.d.	n.d.	n.d.	n.d.	n.d.	n.d.	n.d.	n.d.	n.d.	n.d.	n.d.	n.d.	n.d.	n.d.	n.d.	n.d.	n.d.
Benzo[ghi]perylene	191-24-2		n.d.	n.d.	n.d.	n.d.	n.d.	n.d.	n.d.	n.d.	n.d.	n.d.	n.d.	n.d.	n.d.	n.d.	n.d.	n.d.	n.d.	n.d.	n.d.	n.d.	n.d.	n.d.	n.d.	n.d.	n.d.	n.d.	n.d.	n.d.	n.d.	n.d.	n.d.	n.d.	n.d.	n.d.	n.d.	n.d.	n.d.	n.d.	n.d.	n.d.	n.d.	n.d.	n.d.	n.d.	n.d.	n.d.	n.d.
Benzo[k]fluoranthene	207-08-9		n.d.	n.d.	n.d.	n.d.	n.d.	n.d.	n.d.	n.d.	n.d.	n.d.	n.d.	n.d.	n.d.	n.d.	n.d.	n.d.	n.d.	n.d.	n.d.	n.d.	n.d.	n.d.	n.d.	n.d.	n.d.	n.d.	n.d.	n.d.	n.d.	n.d.	n.d.	n.d.	n.d.	n.d.	n.d.	n.d.	n.d.	n.d.	n.d.	n.d.	n.d.	n.d.	n.d.	n.d.	n.d.	n.d.	n.d.
Chrysene	218-01-9		n.d.	n.d.	n.d.	n.d.	n.d.	n.d.	n.d.	n.d.	n.d.	n.d.	n.d.	n.d.	n.d.	n.d.	n.d.	n.d.	n.d.	n.d.	n.d.	n.d.	n.d.	n.d.	n.d.	n.d.	n.d.	n.d.	n.d.	n.d.	n.d.	n.d.	n.d.	n.d.	n.d.	n.d.	n.d.	n.d.	n.d.	n.d.	n.d.	n.d.	n.d.	n.d.	n.d.	n.d.	n.d.	n.d.	n.d.
Dibenz[a,h]anthracene	53-70-3		n.d.	n.d.	n.d.	n.d.	n.d.	n.d.	n.d.	n.d.	n.d.	n.d.	n.d.	n.d.	n.d.	n.d.	n.d.	n.d.	n.d.	n.d.	n.d.	n.d.	n.d.	n.d.	n.d.	n.d.	n.d.	n.d.	n.d.	n.d.	n.d.	n.d.	n.d.	n.d.	n.d.	n.d.	n.d.	n.d.	n.d.	n.d.	n.d.	n.d.	n.d.	n.d.	n.d.	n.d.	n.d.	n.d.	n.d.
Dibenzo[a,e]pyrene	192-65-4		n.d.	n.d.	n.d.	n.d.	n.d.	n.d.	n.d.	n.d.	n.d.	n.d.	n.d.	n.d.	n.d.	n.d.	n.d.	n.d.	n.d.	n.d.	n.d.	n.d.	n.d.	n.d.	n.d.	n.d.	n.d.	n.d.	n.d.	n.d.	n.d.	n.d.	n.d.	n.d.	n.d.	n.d.	n.d.	n.d.	n.d.	n.d.	n.d.	n.d.	n.d.	n.d.	n.d.	n.d.	n.d.	n.d.	n.d.
Indeno[1,2,3cd]fluoranthene	193-43-1		n.d.	n.d.	n.d.	n.d.	n.d.	n.d.	n.d.	n.d.	n.d.	n.d.	n.d.	n.d.	n.d.	n.d.	n.d.	n.d.	n.d.	n.d.	n.d.	n.d.	n.d.	n.d.	n.d.	n.d.	n.d.	n.d.	n.d.	n.d.	n.d.	n.d.	n.d.	n.d.	n.d.	n.d.	n.d.	n.d.	n.d.	n.d.	n.d.	n.d.	n.d.	n.d.	n.d.	n.d.	n.d.	n.d.	n.d.
Indeno[1,2,3-cd]pyrene	193-39-5		n.d.	n.d.	n.d.	n.d.	n.d.	n.d.	n.d.	n.d.	n.d.	n.d.	n.d.	n.d.	n.d.	n.d.	n.d.	n.d.	n.d.	n.d.	n.d.	n.d.	n.d.	n.d.	n.d.	n.d.	n.d.	n.d.	n.d.	n.d.	n.d.	n.d.	n.d.	n.d.	n.d.	n.d.	n.d.	n.d.	n.d.	n.d.	n.d.	n.d.	n.d.	n.d.	n.d.	n.d.	n.d.	n.d.	n.d.
Perylene	198-55-0		n.d.	n.d.	n.d.	n.d.	n.d.	n.d.	n.d.	n.d.	n.d.	n.d.	n.d.	n.d.	n.d.	n.d.	n.d.	n.d.	n.d.	n.d.	n.d.	n.d.	n.d.	n.d.	n.d.	n.d.	n.d.	n.d.	n.d.	n.d.	n.d.	n.d.	n.d.	n.d.	n.d.	n.d.	n.d.	n.d.	n.d.	n.d.	n.d.	n.d.	n.d.	n.d.	n.d.	n.d.	n.d.	n.d.	n.d.
m-Terphenyl	92-06-8		n.d.	n.d.	n.d.	n.d.	n.d.	n.d.	n.d.	n.d.	n.d.	n.d.	n.d.	n.d.	n.d.	n.d.	n.d.	n.d.	n.d.	n.d.	n.d.	n.d.	n.d.	n.d.	n.d.	n.d.	n.d.	n.d.	n.d.	n.d.	n.d.	n.d.	n.d.	n.d.	n.d.	n.d.	n.d.	n.d.	n.d.	n.d.	n.d.	n.d.	n.d.	n.d.	n.d.	n.d.	n.d.	n.d.	n.d.
o-Terphenyl	84-15-1		n.d.	n.d.	n.d.	n.d.	n.d.	n.d.	n.d.	n.d.	n.d.	n.d.	n.d.	n.d.	n.d.	n.d.	n.d.	n.d.	n.d.	n.d.	n.d.	n.d.	n.d.	n.d.	n.d.	n.d.	n.d.	n.d.	n.d.	n.d.	n.d.	n.d.	n.d.	n.d.	n.d.	n.d.	n.d.	n.d.	n.d.	n.d.	n.d.	n.d.	n.d.	n.d.	n.d.	n.d.	n.d.	n.d.	n.d.
p-Terphenyl	92-94-4		n.d.	n.d.	n.d.	n.d.	n.d.	n.d.	n.d.	n.d.	n.d.	n.d.	n.d.	n.d.	n.d.	n.d.	n.d.	n.d.	n.d.	n.d.	n.d.	n.d.	n.d.	n.d.	n.d.	n.d.	n.d.	n.d.	n.d.	n.d.	n.d.	n.d.	n.d.	n.d.	n.d.	n.d.	n.d.	n.d.	n.d.	n.d.	n.d.	n.d.	n.d.	n.d.	n.d.	n.d.	n.d.	n.d.	n.d.
Aldrin	309-00-2		n.d.	n.d.	n.d.	n.d.	n.d.	n.d.	n.d.	n.d.	n.d.	n.d.	n.d.	n.d.	n.d.	n.d.	n.d.	n.d.	n.d.	n.d.	n.d.	n.d.	n.d.	n.d.	n.d.	n.d.	n.d.	n.d.	n.d.	n.d.	n.d.	n.d.	n.d.	n.d.	n.d.	n.d.	n.d.	n.d.	n.d.	n.d.	n.d.	n.d.	n.d.	n.d.	n.d.	n.d.	n.d.	n.d.	n.d.
1,1-Dichloro-2,2-bis(4-methoxyphenyl)ethan	7388-31-0		n.d.	n.d.	n.d.	n.d.	n.d.	n.d.	n.d.	n.d.	n.d.	n.d.	n.d.	n.d.	n.d.	n.d.	n.d.	n.d.	n.d.	n.d.	n.d.	n.d.	n.d.	n.d.	n.d.	n.d.	n.d.	n.d.	n.d.	n.d.	n.d.	n.d.	n.d.	n.d.	n.d.	n.d.	n.d.	n.d.	n.d.	n.d.	n.d.	n.d.	n.d.	n.d.	n.d.	n.d.	n.d.	n.d.	n.d.
beta-Endosulfan	33213-65-9		n.d.	n.d.	n.d.	n.d.	n.d.	n.d.	n.d.	n.d.	n.d.	n.d.	n.d.	n.d.	n.d.	n.d.	n.d.	n.d.	n.d.	n.d.	n.d.	n.d.	n.d.	n.d.	n.d.	n.d.	n.d.	n.d.	n.d.	n.d.	n.d.	n.d.	n.d.	n.d.	n.d.	n.d.	n.d.	n.d.	n.d.	n.d.	n.d.	n.d.	n.d.	n.d.	n.d.	n.d.	n.d.	n.d.	n.d.
Endosulfan sulfate	1031-07-8		n.d.	n.d.	n.d.	n.d.	n.d.	n.d.	n.d.	n.d.	n.d.	n.d.	n.d.	n.d.	n.d.	n.d.	n.d.	n.d.	n.d.	n.d.	n.d.	n.d.	n.d.	n.d.	n.d.	n.d.	n.d.	n.d.	n.d.	n.d.	n.d.	n.d.	n.d.	n.d.	n.d.	n.d.	n.d.	n.d.	n.d.	n.d.	n.d.	n.d.	n.d.	n.d.	n.d.	n.d.	n.d.	n.d.	n.d.
Endrin	72-20-8		n.d.	n.d.	n.d.	n.d.	n.d.	n.d.	n.d.	n.d.	n.d.	n.d.	n.d.	n.d.	n.d.	n.d.	n.d.	n.d.	n.d.	n.d.	n.d.	n.d.	n.d.	n.d.	n.d.	n.d.	n.d.	n.d.	n.d.	n.d.	n.d.	n.d.	n.d.	n.d.	n.d.	n.d.	n.d.	n.d.	n.d.	n.d.	n.d.	n.d.	n.d.	n.d.	n.d.	n.d.	n.d.	n.d.	n.d.
Endrin aldehyde	7421-93-4		n.d.	n.d.	n.d.	n.d.	n.d.	n.d.	n.d.	n.d.	n.d.	n.d.	n.d.	n.d.	n.d.	n.d.	n.d.	n.d.	n.d.	n.d.	n.d.	n.d.	n.d.	n.d.	n.d.	n.d.	n.d.	n.d.	n.d.	n.d.	n.d.	n.d.	n.d.	n.d.	n.d.	n.d.	n.d.	n.d.	n.d.	n.d.	n.d.	n.d.	n.d.	n.d.	n.d.	n.d.	n.d.	n.d.	n.d.
Endrin ketone	53494-70-5		n.d.	n.d.	n.d.	n.d.	n.d.	n.d.	n.d.	n.d.	n.d.	n.d.	n.d.	n.d.	n.d.	n.d.	n.d.	n.d.	n.d.	n.d.	n.d.	n.d.	n.d.	n.d.	n.d.	n.d.	n.d.	n.d.	n.d.	n.d.	n.d.	n.d.	n.d.	n.d.	n.d.	n.d.	n.d.	n.d.	n.d.	n.d.	n.d.	n.d.	n.d.	n.d.	n.d.	n.d.	n.d.	n.d.	n.d.
Heptachlor	76-44-8		n.d.	n.d.	n.d.	n.d.	n.d.	n.d.	n.d.	n.d.	n.d.	n.d.	n.d.	n.d.	n.d.	n.d.	n.d.	n.d.	n.d.	n.d.	n.d.	n.d.	n.d.	n.d.	n.d.	n.d.	n.d.	n.d.	n.d.	n.d.	n.d.	n.d.	n.d.	n.d.	n.d.	n.d.	n.d.	n.d.	n.d.	n.d.	n.d.	n.d.	n.d.	n.d.	n.d.	n.d.	n.d.	n.d.	n.d.
Methoxychlor	72-43-5		n.d.	n.d.	n.d.	n.d.	n.d.	n.d.	n.d.	n.d.	n.d.	n.d.	n.d.	n.d.	n.d.	n.d.	n.d.	n.d.	n.d.	n.d.	n.d.	n.d.	n.d.	n.d.	n.d.	n.d.	n.d.	n.d.	n.d.	n.d.	n.d.	n.d.	n.d.	n.d.	n.d.	n.d.	n.d.	n.d.	n.d.	n.d.	n.d.	n.d.	n.d.	n.d.	n.d.	n.d.	n.d.	n.d.	n.d.
Pentachloronitrobenzene	82-68-8		n.d.	n.d.	n.d.	n.d.	n.d.	n.d.	n.d.	n.d.	n.d.	n.d.	n.d.	n.d.	n.d.	n.d.	n.d.	n.d.	n.d.	n.d.	n.d.	n.d.	n.d.	n.d.	n.d.	n.d.	n.d.	n.d.	n.d.	n.d.	n.d.	n.d.	n.d.	n.d.	n.d.	n.d.	n.d.	n.d.	n.d.	n.d.	n.d.	n.d.	n.d.	n.d.	n.d.	n.d.	n.d.	n.d.	n.d.
Triclosan-methyl	[4640-01-1]		n.d.	n.d.	n.d.	n.d.	n.d.	n.d.	n.d.	n.d.	n.d.	n.d.	n.d.	n.d.	n.d.	n.d.	n.d.	n.d.	n.d.	n.d.	n.d.	n.d.	n.d.	n.d.	n.d.	n.d.	n.d.	n.d.	n.d.	n.d.	n.d.	n.d.	n.d.	n.d.	n.d.	n.d.	n.d.	n.d.	n.d.	n.d.	n.d.	n.d.	n.d.	n.d.	n.d.	n.d.	n.d.	n.d.	n.d.
3-Bromocarbazole	1592-95-6		n.d.	n.d.	n.d.	n.d.	n.d.	n.d.	n.d.	n.d.	n.d.	n.d.	n.d.	n.d.	n.d.	n.d.	n.d.	n.d.	n.d.	n.d.	n.d.	n.d.	n.d.	n.d.	n.d.	n.d.	n.d.	n.d.	n.d.	n.d.	n.d.	n.d.	n.d.	n.d.	n.d.	n.d.	n.d.	n.d.	n.d.	n.d.	n.d.	n.d.	n.d.	n.d.	n.d.	n.d.	n.d.	n.d.	n.d.
Hexabromobenzene	87-82-1		n.d.	n.d.	n.d.	n.d.	n.d.	n.d.	n.d.	n.d.	n.d.	n.d.	n.d.	n.d.	n.d.	n.d.	n.d.	n.d.	n.d.	n.d.	n.d.	n.d.	n.d.	n.d.	n.d.	n.d.	n.d.	n.d.	n.d.	n.d.	n.d.	n.d.	n.d.	n.d.	n.d.	n.d.	n.d.	n.d.	n.d.	n.d.	n.d.	n.d.	n.d.	n.d.	n.d.	n.d.	n.d.	n.d.	n.d.
BDE-153	68631-49-2		n.d.	n.d.	n.d.	n.d.	n.d.	n.d.	n.d.	n.d.	n.d.	n.d.	n.d.	n.d.	n.d.	n.d.	n.d.	n.d.	n.d.	n.d.	n.d.	n.d.	n.d.	n.d.	n.d.	n.d.	n.d.	n.d.	n.d.	n.d.	n.d.	n.d.	n.d.	n.d.	n.d.	n.d.	n.d.	n.d.	n.d.	n.d.	n.d.	n.d.	n.d.	n.d.	n.d.	n.d.	n.d.	n.d.	n.d.
BDE-154	207122-15-4		n.d.	n.d.	n.d.	n.d.	n.d.	n.d.	n.d.	n.d.	n.d.	n.d.	n.d.	n.d.	n.d.	n.d.	n.d.	n.d.	n.d.	n.d.	n.d.	n.d.	n.d.	n.d.	n.d.	n.d.	n.d.	n.d.	n.d.	n.d.	n.d.	n.d.	n.d.	n.d.	n.d.	n.d.	n.d.	n.d.	n.d.	n.d.	n.d.	n.d.	n.d.	n.d.	n.d.	n.d.	n.d.	n.d.	n.d.
Acrinathrin	101007-06-1		n.d.	n.d.	n.d.	n.d.	n.d.	n.d.	n.d.	n.d.	n.d.	n.d.	n.d.	n.d.	n.d.	n.d.	n.d.	n.d.	n.d.	n.d.	n.d.	n.d.	n.d.	n.d.	n.d.	n.d.	n.d.	n.d.	n.d.	n.d.	n.d.	n.d.	n.d.	n.d.	n.d.	n.d.	n.d.	n.d.	n.d.	n.d.	n.d.	n.d.	n.d.	n.d.	n.d.	n.d.	n.d.	n.d.	n.d.
Chlorpyrifos	2921-88-2		n.d.	n.d.	n.d.	n.d.	n.d.	n.d.	n.d.	n.d.	n.d.	n.d.	n.d.	n.d.	n.d.	n.d.	n.d.	n.d.	n.d.	n.d.	n.d.	n.d.	n.d.	n.d.	n.d.	n.d.	n.d.	n.d.	n.d.	n.d.	n.d.	n.d.	n.d.	n.d.	n.d.	n.d.	n.d.	n.d.	n.d.	n.d.	n.d.	n.d.	n.d.	n.d.	n.d.	n.d.	n.d.	n.d.	n.d.
Cyfluthrin	68359-37-5		n.d.	n.d.	n.d.	n.d.	n.d.	n.d.	n.d.	n.d.	n.d.	n.d.	n.d.	n.d.	n.d.	n.d.	n.d.	n.d.	n.d.	n.d.	n.d.	n.d.	n.d.	n.d.	n.d.	n.d.	n.d.	n.d.	n.d.	n.d.	n.d.	n.d.	n.d.	n.d.	n.d.	n.d.	n.d.	n.d.	n.d.	n.d.	n.d.	n.d.	n.d.	n.d.	n.d.	n.d.	n.d.	n.d.	n.d.
Cypermethrin	52315-07-8		n.d.	n.d.	n.d.	n.d.	n.d.	n.d.	n.d.	n.d.	n.d.	n.d.	n.d.	n.d.	n.d.	n.d.	n.d.	n.d.	n.d.	n.d.	n.d.	n.d.	n.d.	n.d.	n.d.	n.d.	n.d.	n.d.	n.d.	n.d.	n.d.	n.d.	n.d.	n.d.	n.d.	n.d.	n.d.	n.d.	n.d.	n.d.	n.d.	n.d.	n.d.	n.d.	n.d.	n.d.	n.d.	n.d.	n.d.
Deltamethrin	52918-63-5		n.d.	n.d.	n.d.	n.d.	n.d.	n.d.	n.d.	n.d.	n.d.	n.d.	n.d.	n.d.	n.d.	n.d.	n.d.	n.d.	n.d.	n.d.	n.d.	n.d.	n.d.	n.d.	n.d.	n.d.	n.d.	n.d.	n.d.	n.d.	n.d.	n.d.	n.d.	n.d.	n.d.	n.d.	n.d.	n.d.	n.d.	n.d.	n.d.	n.d.	n.d.	n.d.	n.d.	n.d.	n.d.	n.d.	n.d.
Esfenvalerate	66230-04-4		n.d.	n.d.	n.d.	n.d.	n.d.	n.d.	n.d.	n.d.	n.d.	n.d.	n.d.	n.d.	n.d.	n.d.	n.d.	n.d.	n.d.	n.d.	n.d.	n.d.	n.d.	n.d.	n.d.	n.d.	n.d.	n.d.	n.d.	n.d.	n.d.	n.d.	n.d.	n.d.	n.d.	n.d.	n.d.	n.d.	n.d.	n.d.	n.d.	n.d.	n.d.	n.d.	n.d.	n.d.	n.d.	n.d.	n.d.
Fluvalinate	69409-94-5		n.d.	n.d.	n.d.	n.d.	n.d.	n.d.	n.d.	n.d.	n.d.	n.d.	n.d.	n.d.	n.d.	n.d.	n.d.	n.d.	n.d.	n.d.	n.d.	n.d.	n.d.	n.d.	n.d.	n.d.	n.d.	n.d.	n.d.	n.d.	n.d.	n.d.	n.d.	n.d.	n.d.	n.d.	n.d.	n.d.	n.d.	n.d.	n.d.	n.d.	n.d.	n.d.	n.d.	n.d.	n.d.	n.d.	n.d.
Tefluthrin	79538-32-2		n.d.	n.d.	n.d.	n.d.	n.d.	n.d.	n.d.	n.d.	n.d.	n.d.	n.d.	n.d.	n.d.	n.d.	n.d.	n.d.	n.d.	n.d.	n.d.	n.d.	n.d.	n.d.	n.d.	n.d.	n.d.	n.d.	n.d.	n.d.	n.d.	n.d.	n.d.	n.d.	n.d.	n.d.	n.d.	n.d.	n.d.	n.d.	n.d.	n.d.	n.d.	n.d.	n.d.	n.d.	n.d.	n.d.	n.d.
1-Chloro-2-nitrobenzene	88-73-3		n.d.	n.d.	n.d.	n.d.	n.d.	n.d.	n.d.	n.d.	n.d.	n.d.	n.d.	n.d.	n.d.	n.d.	n.d.	n.d.	n.d.	n.d.	n.d.	n.d.	n.d.	n.d.	n.d.	n.d.	n.d.	n.d.	n.d.	n.d.	n.d.	n.d.	n.d.	n.d.	n.d.	n.d.	n.d.	n.d.	n.d.	n.d.	n.d.	n.d.	n.d.	n.d.	n.d.	n.d.	n.d.	n.d.	n.d.
Ambrettolide	123-69-3		n.d.	n.d.	n.d.	n.d.	n.d.	n.d.	n.d.	n.d.	n.d.	n.d.	n.d.	n.d.	n.d.	n.d.	n.d.	n.d.	n.d.	n.d.	n.d.	n.d.	n.d.	n.d.	n.d.	n.d.	n.d.	n.d.	n.d.	n.d.	n.d.	n.d.	n.d.	n.d.	n.d.	n.d.	n.d.	n.d.	n.d.	n.d.	n.d.	n.d.	n.d.	n.d.	n.d.	n.d.	n.d.	n.d.	n.d.
Celestolide	13171-00-1		n.d.	n.d.	n.d.	n.d.	n.d.	n.d.	n.d.	n.d.	n.d.	n.d.	n.d.	n.d.	n.d.	n.d.	n.d.	n.d.	n.d.	n.d.	n.d.	n.d.	n.d.	n.d.	n.d.	n.d.	n.d.	n.d.	n.d.	n.d.	n.d.	n.d.	n.d.	n.d.	n.d.	n.d.	n.d.	n.d.	n.d.	n.d.	n.d.	n.d.	n.d.	n.d.	n.d.	n.d.	n.d.	n.d.	n.d.
Musk ambrette	83-66-9		n.d.	n.d.	n.d.	n.d.	n.d.	n.d.	n.d.	n.d.	n.d.	n.d.	n.d.	n.d.	n.d.	n.d.	n.d.	n.d.	n.d.	n.d.	n.d.	n.d.	n.d.	n.d.	n.d.	n.d.	n.d.	n.d.	n.d.	n.d.	n.d.	n.d.	n.d.	n.d.	n.d.	n.d.	n.d.	n.d.	n.d.	n.d.	n.d.	n.d.	n.d.	n.d.	n.d.	n.d.	n.d.	n.d.	n.d.
Musk ketone	81-14-1		n.d.	n.d.	n.d.	n.d.	n.d.	n.d.	n.d.	n.d.	n.d.	n.d.	n.d.	n.d.	n.d.	n.d.	n.d.	n.d.	n.d.	n.d.	n.d.	n.d.	n.d.	n.d.	n.d.	n.d.	n.d.	n.d.	n.d.	n.d.	n.d.	n.d.	n.d.	n.d.	n.d.	n.d.	n.d.	n.d.	n.d.	n.d.	n.d.	n.d.	n.d.	n.d.	n.d.	n.d.	n.d.	n.d.	n.d.
Musk xylene	81-15-2		n.d.	n.d.	n.d.	n.d.	n.d.	n.d.	n.d.	n.d.	n.d.	n.d.	n.d.	n.d.	n.d.	n.d.	n.d.	n.d.	n.d.	n.d.	n.d.	n.d.	n.d.	n.d.	n.d.	n.d.	n.d.	n.d.	n.d.	n.d.	n.d.	n.d.	n.d.	n.d.	n.d.	n.d.	n.d.	n.d.	n.d.	n.d.	n.d.	n.d.	n.d.	n.d.	n.d.	n.d.	n.d.	n.d.	n.d.
Phantolide	15323-35-0		n.d.	n.d.	n.d.	n.d.	n.d.	n.d.	n.d.	n.d.	n.d.	n.d.	n.d.	n.d.	n.d.	n.d.	n.d.	n.d.	n.d.	n.d.	n.d.	n.d.	n.d.	n.d.	n.d.	n.d.	n.d.	n.d.	n.d.	n.d.	n.d.	n.d.	n.d.	n.d.	n.d.	n.d.	n.d.	n.d.	n.d.	n.d.	n.d.	n.d.	n.d.	n.d.	n.d.	n.d.	n.d.	n.d.	n.d.
Velvione	37609-25-9		n.d.	n.d.	n.d.	n.d.	n.d.	n.d.	n.d.	n.d.	n.d.	n.d.	n.d.	n.d.	n.d.	n.d.	n.d.	n.d.	n.d.	n.d.	n.d.	n.d.	n.d.	n.d.	n.d.	n.d.	n.d.	n.d.	n.d.	n.d.	n.d.	n.d.	n.d.	n.d.	n.d.	n.d.	n.d.	n.d.	n.d.	n.d.	n.d.	n.d.	n.d.	n.d.	n.d.	n.d.	n.d.	n.d.	n.d.
Methyl tolyl sulfone	3185-99-7		n.d.	n.d.	n.d.	n.d.	n.d.	n.d.	n.d.	n.d.	n.d.	n.d.	n.d.	n.d.	n.d.	n.d.	n.d.	n.d.	n.d.	n.d.	n.d.	n.d.	n.d.	n.d.	n.d.	n.d.	n.d.	n.d.	n.d.	n.d.	n.d.	n.d.	n.d.	n.d.	n.d.	n.d.	n.d.	n.d.	n.d.	n.d.	n.d.	n.d.	n.d.	n.d.	n.d.	n.d.	n.d.	n.d.	n.d.
Dioctyldiphenylamine	101-67-7		n.d.	n.d.	n.d.	n.d.	n.d.	n.d.	n.d.	n.d.	n.d.	n.d.	n.d.	n.d.	n.d.	n.d.	n.d.	n.d.	n.d.	n.d.	n.d.	n.d.	n.d.	n.d.	n.d.	n.d.	n.d.	n.d.	n.d.	n.d.	n.d.	n.d.	n.d.	n.d.	n.d.	n.d.	n.d.	n.d.	n.d.	n.d.	n.d.	n.d.	n.d.	n.d.	n.d.	n.d.	n.d.	n.d.	n.d.
Piperonyl butoxide	51-03-6		n.d.	n.d.	n.d.	n.d.	n.d.	n.d.	n.d.	n.d.	n.d.	n.d.	n.d.	n.d.	n.d.	n.d.	n.d.	n.d.	n.d.	n.d.	n.d.	n.d.	n.d.	n.d.	n.d.	n.d.	n.d.	n.d.	n.d.	n.d.	n.d.	n.d.	n.d.	n.d.	n.d.	n.d.	n.d.	n.d.	n.d.	n.d.	n.d.	n.d.	n.d.	n.d.	n.d.	n.d.	n.d.	n.d.	n.d.
Values that exceeded the highest concentrations in the calibration are marked in orange, as these values are extrapolated.
[truncated: 105 more columns]

## Sheet: Table S6
Table S6. Analytical results of selected compounds of the solvent extracted blubber samples in clipid (mganalyte/kglipid). P.p.: harbor porpoise, P.v.: harbor seal, O.o.: orca, plus running number.
Compound Name	CAS	P.p.1, Blubber	P.p.2, Blubber	P.p.3, Blubber	P.p.4, Blubber	P.p.5, Blubber	P.v.1, Blubber	O.o.1, Blubber
PCB 18	37680-65-2	0.0160108	0.00668655	n.d.	0.0122818	n.d.	n.d.	0.0418246
PCB 28/31	7012-37-5	n.d.	n.d.	n.d.	n.d.	n.d.	n.d.	0.0465732
PCB 44	41464-39-5	n.d.	n.d.	n.d.	n.d.	n.d.	n.d.	0.089481
PCB 52	35693-99-3	0.603435	0.232608	n.d.	0.269707	n.d.	n.d.	7.32936
PCB 101	37680-73-2	0.606473	0.662587	0.0983523	0.367768	0.0432109	0.0514413	2.33211
PCB 118	31508-00-6	0.28957	0.147044	0.217286	n.d.	n.d.	n.d.	2.56183
PCB 138	35065-28-2	5.12131	3.51528	1.21396	2.59872	0.148487	1.12078	13.8646
PCB 149	38380-04-0	3.93939	3.04188	0.206329	1.92787	0.0749342	0.152757	8.73727
PCB 153	35065-27-1	7.56815	5.75341	2.32884	4.33291	0.31153	2.90441	22.4616
PCB 170	35065-30-6	0.401468	0.195488	n.d.	n.d.	n.d.	n.d.	1.56435
PCB 180	35065-29-3	0.962903	0.623026	0.582985	0.444751	n.d.	0.890608	4.29571
PCB 194	35694-08-7	n.d.	n.d.	n.d.	n.d.	n.d.	n.d.	n.d.
PCB 209	2051-24-3	n.d.	n.d.	n.d.	n.d.	n.d.	n.d.	n.d.
Acenaphthene	83-32-9	n.d.	0.278077	0.224971	0.207483	0.171568	0.100904	0.0709557
Acenaphthylene	208-96-8	0.0398092	0.0339507	0.133783	0.0466603	0.0765623	0.0987344	0.0711912
Anthracene	120-12-7	0.0424779	0.0401567	0.0229366	0.0294745	n.d.	0.010817	0.0223465
Benz[a]anthracene	56-55-3	n.d.	n.d.	0.0450065	n.d.	n.d.	0.0198558	0.0197437
Fluoranthene	206-44-0	n.d.	n.d.	0.104735	n.d.	n.d.	0.0616639	0.0383445
Fluorene	86-73-7	0.156654	0.157531	0.339461	0.167313	0.216856	n.d.	0.205099
Phenanthrene	85-01-8	0.19193	0.191383	0.649248	0.215586	0.26137	0.44762	0.3092
Pyrene	129-00-0	n.d.	n.d.	0.148322	n.d.	n.d.	0.054864	0.0553097
4,4'-DDE	72-55-9	6.13498	5.01555	2.55456	5.6269	0.342191	0.82859	114.23
4,4'-DDD	72-54-8	0.382108	0.260786	0.103684	0.201127	n.d.	n.d.	1.15035
4,4'-DDT	50-29-3	0.963925	0.63718	0.580612	1.43571	0.0918483	n.d.	1.08571
Dieldrin	60-57-1	3.10991	1.59739	n.d.	1.06385	n.d.	n.d.	9.98004
α-HCH	319-84-6	n.d.	n.d.	n.d.	n.d.	n.d.	n.d.	n.d.
β- HCH	319-85-7	n.d.	n.d.	n.d.	n.d.	n.d.	n.d.	n.d.
γ-HCH	58-89-9	n.d.	n.d.	n.d.	n.d.	n.d.	n.d.	n.d.
δ-HCH	319-86-8	n.d.	n.d.	n.d.	n.d.	n.d.	n.d.	n.d.
Hexachlorobenzene	118-74-1	0.65833	0.331016	n.d.	0.518068	n.d.	n.d.	1.3427
Pentachlorobenzene	608-93-5	n.d.	n.d.	n.d.	n.d.	n.d.	n.d.	n.d.

## Sheet: Table S7
Table S7. Converted concentrations in PDMS to lipid-associated concentrations in clipid,eq. (mganalyte/kglipid). The asterisk (*) marks compounds for which no literature conversion factor of Klipid/PDMS was available and thus an average factor was used for the calculation. P.p.: harbor porpoise, P.v.: harbor seal, P.h.: ringed seal, O.o.: orca, plus running number.
	Compound Name	CAS	P.p.1, Liver	P.p.1, Blubber	P.p.2, Liver	P.p.2, Blubber	P.p.3, Liver	P.p.3, Blubber	P.p.3, Brain	P.p.3, Kidney	P.p.4, Liver	P.p.4, Blubber	P.p.4, Brain	P.p.4, Kidney	P.p.5, Liver	P.p.5, Blubber	P.p.5, Brain	P.p.5, Kidney	P.p.6, Liver	P.p.6, Blubber	P.p.6, Brain	P.p.6, Kidney	P.p.7, Liver	P.p.7, Blubber	P.v.1, Liver	P.v.1, Blubber	P.v.1, Brain	P.v.1, Kidney	P.v.2, Liver	P.v.2, Blubber	P.v.2, Brain	P.v.2, Kidney	P.v.3, Liver	P.v.3, Blubber	P.v.3, Brain	P.v.3, Kidney	P.h.1, Liver	P.h.1, Blubber	O.o.1, Liver	O.o.1, Blubber	O.o.1, Brain	O.o.1, Kidney
	PCB 18	37680-65-2	0.175024	0.0128495	0.00990071	0.00558804	n.d.	n.d.	0.00448548	n.d.	0.0147418	0.0116155	0.0124281	0.00782096	n.d.	n.d.	0.00783105	0.00436238	0.0179701	0.0200268	0.0131842	0.0126448	0.00673125	0.0049547	0.00561259	n.d.	n.d.	0.00214182	n.d.	n.d.	n.d.	n.d.	n.d.	n.d.	n.d.	n.d.	n.d.	n.d.	0.115223	0.0200526	0.0442116	0.0682418
	PCB 28/31	7012-37-5	0.00854044	n.d.	n.d.	n.d.	n.d.	n.d.	n.d.	n.d.	n.d.	n.d.	n.d.	n.d.	n.d.	n.d.	n.d.	0.0289074	n.d.	n.d.	n.d.	n.d.	n.d.	n.d.	n.d.	n.d.	n.d.	n.d.	n.d.	n.d.	n.d.	n.d.	n.d.	n.d.	n.d.	n.d.	n.d.	n.d.	0.093943	0.0310845	0.0485234	0.0709626
	PCB 44	41464-39-5	n.d.	n.d.	n.d.	n.d.	n.d.	n.d.	n.d.	n.d.	n.d.	0.0277062	n.d.	n.d.	n.d.	n.d.	n.d.	0.0290739	0.0414728	0.0212291	0.0303239	0.028353	n.d.	n.d.	n.d.	n.d.	n.d.	n.d.	n.d.	n.d.	n.d.	n.d.	n.d.	n.d.	n.d.	n.d.	n.d.	n.d.	0.192246	0.06189	0.116675	0.177199
	PCB 52	35693-99-3	1.0826	0.357507	0.408458	0.176063	n.d.	n.d.	n.d.	n.d.	0.242664	0.222974	0.142756	0.160562	n.d.	n.d.	n.d.	n.d.	0.358654	0.194907	0.252072	0.262805	0.207511	0.0909245	n.d.	n.d.	n.d.	n.d.	0.188425	0.153333	0.297994	0.225996	0.0692358	0.07432	0.0754256	0.0602564	n.d.	n.d.	16.7373	4.31847	6.47847	11.6321
	PCB 101	37680-73-2	0.713448	0.301127	1.21319	0.385116	0.09411	0.0786196	0.104079	0.117979	0.318611	0.274802	0.205533	0.210679	0.0918902	0.0545958	0.121811	0.159976	0.653521	0.421388	0.47833	0.736061	0.71906	0.524622	0.0864467	0.0678136	0.122354	0.0962153	0.609356	0.750016	1.25639	0.911406	0.182121	0.366088	0.25664	0.250885	0.106124	0.0805107	7.38966	1.88833	3.40352	5.74134
	PCB 118	31508-00-6	1.03352	0.288494	1.5041	0.258446	n.d.	n.d.	n.d.	n.d.	0.396854	0.132992	0.213118	n.d.	n.d.	n.d.	n.d.	n.d.	0.364961	n.d.	n.d.	n.d.	1.06491	n.d.	n.d.	n.d.	n.d.	n.d.	n.d.	n.d.	0.495612	n.d.	n.d.	n.d.	n.d.	n.d.	n.d.	n.d.	6.72932	1.22414	3.55072	4.68473
	PCB 138	35065-28-2	5.89754	1.93906	6.51451	1.62699	0.715718	0.743869	0.678016	0.688679	1.67261	1.45286	0.95473	0.909464	n.d.	0.134906	0.237756	0.329393	2.155	0.954551	1.53058	2.34508	3.98602	2.10827	0.769004	0.837185	1.22809	0.614579	7.58897	7.45643	14.0467	13.1626	1.45053	2.61291	1.94387	2.17832	0.411626	0.364823	63.9724	10.0569	21.7894	38.1814
	PCB 149	38380-04-0	3.86343	1.77957	4.42754	1.6931	0.181843	0.19658	0.151846	0.162375	1.87389	1.6593	1.03153	0.907364	0.222686	0.135737	0.205952	0.266798	1.1011	1.03015	0.919255	1.897	1.2917	1.27241	0.19184	0.306084	0.381741	0.182848	1.11587	2.05194	2.29919	1.91106	0.300632	0.939998	0.390108	0.572045	n.d.	0.0569081	39.6989	8.15955	14.3195	26.1957
	PCB 153	35065-27-1	13.3494	3.58717	14.638	2.97957	1.45065	1.101	1.14127	1.21887	3.90541	2.54381	1.93296	1.7564	0.629065	0.278824	0.461495	0.661593	3.95533	1.8152	2.93125	4.88564	7.64032	3.70812	1.64274	1.88974	2.76435	1.90413	14.9267	15.3101	30.4909	28.7	2.70732	4.89516	3.87856	4.04808	0.523077	0.500004	90.4602	15.3784	32.9745	61.0468
	PCB 170	35065-30-6	0.827724	0.199218	0.951646	0.155671	0.0609621	0.0742084	0.0661873	0.111954	0.0612623	0.104682	0.0439913	0.0392981	n.d.	n.d.	n.d.	n.d.	0.287758	0.0170244	0.201689	0.324382	0.716647	0.222041	0.0449408	0.307322	0.326209	0.042035	1.51984	1.18666	2.69217	2.80616	0.130594	0.261592	0.240106	0.216313	0.0298735	0.043641	5.24386	0.952788	2.08445	3.92126
	PCB 180	35065-29-3	2.02087	0.432131	2.03352	0.306953	0.31716	0.248338	0.259094	0.279999	0.452441	0.290412	0.269748	0.183159	0.0596655	0.0377306	0.0641441	0.117799	0.4383	0.28984	0.338933	0.730624	1.32463	0.801367	0.27623	0.318163	0.740021	0.349489	1.8078	2.88721	3.3819	5.47093	0.184611	0.627882	0.375219	0.461875	0.0905832	0.14482	17.7879	2.42019	5.66615	11.0897
	PCB 194	35694-08-7	0.464958	n.d.	n.d.	n.d.	n.d.	n.d.	n.d.	n.d.	n.d.	n.d.	n.d.	n.d.	n.d.	n.d.	n.d.	n.d.	n.d.	n.d.	n.d.	n.d.	n.d.	n.d.	n.d.	n.d.	n.d.	n.d.	n.d.	n.d.	0.390278	0.588691	n.d.	n.d.	n.d.	n.d.	n.d.	n.d.	0.847316	n.d.	n.d.	0.606866
	PCB 209	2051-24-3	0.0964974	n.d.	0.0405059	n.d.	n.d.	n.d.	n.d.	n.d.	n.d.	n.d.	n.d.	n.d.	n.d.	n.d.	n.d.	n.d.	n.d.	n.d.	n.d.	n.d.	n.d.	n.d.	n.d.	0.113292	n.d.	n.d.	n.d.	n.d.	n.d.	n.d.	n.d.	n.d.	n.d.	n.d.	n.d.	n.d.	n.d.	n.d.	n.d.	n.d.
	Acenaphthene	83-32-9	0.0906646	0.0882467	0.0826356	0.204739	0.107831	0.106931	n.d.	1.13171	0.174317	0.137126	0.070575	0.00398427	0.0992907	n.d.	n.d.	n.d.	n.d.	n.d.	n.d.	n.d.	n.d.	n.d.	0.0711696	0.096093	0.126528	0.0542254	n.d.	n.d.	n.d.	0.0203331	n.d.	n.d.	n.d.	n.d.	n.d.	n.d.	0.138652	n.d.	0.121423	0.00775225
	Acenaphthylene	208-96-8	0.0641594	0.00815662	0.248011	0.00891213	0.0132683	0.0120651	0.0159098	0.0267077	0.0198153	0.00570199	0.0286391	0.000928679	0.016033	n.d.	0.0108357	0.00691153	0.00402522	0.0044926	0.00240011	0.00293264	0.00875551	0.00164685	0.0182357	n.d.	0.00210991	0.0149313	0.00142072	n.d.	n.d.	0.00399449	0.00651122	0.0170498	0.00341272	0.00477813	0.00337525	n.d.	0.0298419	0.00190481	0.162674	0.0118576
	Anthracene	120-12-7	0.123485	0.0078616	0.013727	0.00848729	0.00490982	0.00537887	0.00316899	0.00427861	0.054185	0.0133009	0.00508168	0.00132634	0.0536764	n.d.	0.00763894	0.00841097	n.d.	0.0156515	n.d.	n.d.	n.d.	0.00712883	0.00550734	n.d.	n.d.	0.00217272	n.d.	n.d.	n.d.	0.000967176	n.d.	0.0138209	n.d.	n.d.	n.d.	0.00456668	0.0038777	0.000866382	n.d.	n.d.
	Benz[a]anthracene	56-55-3	n.d.	n.d.	n.d.	n.d.	n.d.	n.d.	n.d.	n.d.	n.d.	n.d.	n.d.	n.d.	n.d.	n.d.	n.d.	n.d.	n.d.	n.d.	n.d.	n.d.	n.d.	n.d.	n.d.	n.d.	n.d.	n.d.	n.d.	n.d.	n.d.	n.d.	n.d.	0.0256328	n.d.	n.d.	n.d.	n.d.	0.0910659	n.d.	0.156334	0.0416618
*	Benzo[b]fluorene	243-17-4	n.d.	0.0163568	n.d.	0.0236582	n.d.	0.0253978	n.d.	0.0131345	n.d.	n.d.	0.0114722	n.d.	n.d.	0.00826745	0.00389805	n.d.	n.d.	n.d.	n.d.	n.d.	n.d.	0.0104165	0.0100459	n.d.	n.d.	0.00636423	n.d.	0.0106445	n.d.	n.d.	n.d.	0.0112979	n.d.	n.d.	n.d.	0.00343339	n.d.	0.0114381	n.d.	n.d.
*	Benzo[e]pyrene	192-97-2	n.d.	n.d.	n.d.	n.d.	n.d.	n.d.	n.d.	n.d.	n.d.	n.d.	0.00744125	n.d.	n.d.	n.d.	0.00088261	n.d.	n.d.	n.d.	0.0029329	n.d.	n.d.	n.d.	n.d.	n.d.	n.d.	n.d.	n.d.	n.d.	n.d.	n.d.	n.d.	n.d.	n.d.	n.d.	n.d.	n.d.	n.d.	n.d.	n.d.	n.d.
*	Cyclopenta[cd]pyrene	27208-37-3	0.00788774	0.00405362	n.d.	0.00588	n.d.	0.0052103	n.d.	0.00257148	n.d.	0.0164094	0.00546458	n.d.	n.d.	n.d.	n.d.	n.d.	n.d.	n.d.	n.d.	n.d.	n.d.	n.d.	n.d.	n.d.	n.d.	n.d.	n.d.	n.d.	n.d.	n.d.	n.d.	n.d.	n.d.	n.d.	n.d.	0.00189224	n.d.	n.d.	n.d.	n.d.
*	4H-Cyclopenta[def]phenanthrene	203-64-5	n.d.	0.00182282	n.d.	n.d.	0.149263	0.00727865	0.000783276	0.0149326	0.139211	0.00297567	0.00765373	n.d.	0.143231	n.d.	n.d.	0.0192677	0.00749842	n.d.	n.d.	n.d.	0.0153504	n.d.	n.d.	n.d.	0.00185206	n.d.	0.00363253	n.d.	n.d.	n.d.	n.d.	0.00598651	0.00432522	n.d.	0.017177	n.d.	0.00384667	n.d.	0.0742587	0.0128244
	Fluoranthene	206-44-0	0.0271913	0.00690334	0.00082476	0.0118075	n.d.	0.013855	0.12012	0.005177	0.0130166	0.0151105	0.022382	n.d.	0.00182877	n.d.	0.049365	n.d.	n.d.	n.d.	n.d.	n.d.	n.d.	n.d.	n.d.	n.d.	n.d.	n.d.	n.d.	n.d.	n.d.	n.d.	n.d.	0.0953155	n.d.	n.d.	n.d.	n.d.	n.d.	n.d.	0.747281	0.096347
	Fluorene	86-73-7	0.280586	0.0197151	0.260301	0.0227133	0.0285695	0.0260461	0.0416862	0.224648	0.0302683	0.0120391	0.280716	0.0142536	0.049231	n.d.	0.0307337	0.0088081	0.0137332	0.0723508	0.00328978	0.0115061	0.0211543	0.052781	0.0505479	0.00155402	0.01351	0.037083	0.0102072	0.0199282	n.d.	0.0179699	0.0100055	0.100789	0.00219628	0.00162305	0.0200786	0.0104058	0.0717568	0.0213936	0.670167	0.0328923
	Phenanthrene	85-01-8	0.332403	0.0567514	0.179944	0.0651769	0.0287988	0.0534295	0.0891325	0.242048	0.130698	0.043799	0.199747	0.00519136	0.0707765	n.d.	0.0524509	0.0364817	n.d.	0.0132784	n.d.	n.d.	0.00770445	0.0122357	0.0128835	n.d.	n.d.	0.0916651	n.d.	n.d.	n.d.	0.022599	n.d.	0.247741	0.00547294	n.d.	0.00681522	n.d.	0.156171	0.00563139	1.45383	0.0419143
	Pyrene	129-00-0	n.d.	n.d.	n.d.	0.000604023	n.d.	0.00957425	0.327213	0.00445675	0.0636808	n.d.	0.0069815	n.d.	0.0108636	n.d.	0.0984831	0.036956	n.d.	n.d.	n.d.	n.d.	n.d.	n.d.	n.d.	n.d.	n.d.	0.00424329	n.d.	n.d.	n.d.	n.d.	n.d.	0.0427299	n.d.	n.d.	n.d.	n.d.	n.d.	n.d.	1.44092	0.0593316
*	9-vinylanthracene	2444-68-0	n.d.	n.d.	n.d.	n.d.	n.d.	0.00924854	0.00371128	n.d.	n.d.	0.0608708	n.d.	n.d.	n.d.	n.d.	n.d.	n.d.	n.d.	n.d.	n.d.	n.d.	n.d.	n.d.	n.d.	n.d.	n.d.	n.d.	n.d.	n.d.	n.d.	n.d.	n.d.	0.0627088	n.d.	n.d.	0.0170454	n.d.	n.d.	n.d.	0.122949	0.0405097
	4,4'-DDE	72-55-9	2.87019	1.98617	3.14004	1.89864	1.39137	1.83438	0.876706	1.08829	2.09321	3.47035	1.26651	1.342	0.839345	0.39646	0.518726	0.73133	1.19903	1.70433	0.619287	1.88779	3.53459	4.31196	0.469852	0.529551	0.757994	0.452673	2.32602	6.14748	3.77252	4.9996	0.663301	2.12207	0.934781	1.49327	0.461549	0.723532	416.15	73.4372	98.6895	210.88
	4,4'-DDD	72-54-8	1.05185	0.209389	0.943452	0.212305	0.206491	0.103259	0.167719	0.155096	0.455562	0.268448	0.201963	0.349605	0.0916716	n.d.	0.144154	0.151417	0.622086	0.120812	0.405666	0.477516	1.03943	0.185405	n.d.	n.d.	n.d.	n.d.	0.384355	n.d.	0.142677	0.317297	0.104737	n.d.	n.d.	0.059535	n.d.	n.d.	8.03749	0.494138	3.39644	5.27414
	4,4'-DDT	50-29-3	n.d.	0.381347	n.d.	0.356239	n.d.	0.430362	0.0633988	n.d.	n.d.	0.759044	n.d.	n.d.	n.d.	0.0498027	n.d.	n.d.	n.d.	0.0975003	0.0382604	0.0803101	n.d.	0.384226	n.d.	0.128924	n.d.	n.d.	n.d.	0.225056	0.123747	n.d.	n.d.	0.0895504	0.0394251	n.d.	n.d.	0.0451791	0.251252	0.467635	0.0744747	0.0308866
*	4,4'-DDMU	1022-22-6	n.d.	0.0477796	n.d.	n.d.	n.d.	n.d.	n.d.	n.d.	n.d.	n.d.	n.d.	n.d.	n.d.	n.d.	n.d.	n.d.	n.d.	n.d.	n.d.	n.d.	n.d.	n.d.	n.d.	n.d.	n.d.	n.d.	n.d.	n.d.	n.d.	n.d.	n.d.	n.d.	n.d.	n.d.	n.d.	n.d.	0.339871	0.060768	0.178011	0.289181
*	Dicofol	115-32-2	n.d.	n.d.	n.d.	n.d.	n.d.	n.d.	n.d.	n.d.	n.d.	n.d.	n.d.	n.d.	n.d.	n.d.	n.d.	n.d.	n.d.	n.d.	n.d.	n.d.	n.d.	n.d.	n.d.	n.d.	n.d.	n.d.	n.d.	n.d.	n.d.	n.d.	n.d.	n.d.	n.d.	n.d.	n.d.	n.d.	n.d.	n.d.	0.0318372	0.019307
	Dieldrin	60-57-1	1.87233	0.986136	0.538789	0.552376	n.d.	n.d.	n.d.	n.d.	0.41381	0.625336	0.253407	n.d.	n.d.	n.d.	n.d.	n.d.	0.497668	0.536708	0.264621	0.570708	n.d.	n.d.	n.d.	n.d.	n.d.	n.d.	n.d.	n.d.	n.d.	n.d.	n.d.	n.d.	n.d.	n.d.	n.d.	n.d.	13.5966	4.45599	6.36244	7.51844
*	alpha-Endosulfan	959-98-8	0.230622	n.d.	n.d.	n.d.	n.d.	n.d.	n.d.	n.d.	n.d.	n.d.	n.d.	n.d.	n.d.	n.d.	n.d.	n.d.	n.d.	n.d.	n.d.	n.d.	n.d.	n.d.	n.d.	n.d.	n.d.	n.d.	n.d.	n.d.	n.d.	n.d.	n.d.	n.d.	n.d.	n.d.	n.d.	n.d.	2.65976	0.632665	0.819222	1.60527
*	Heptachlor-endo-epoxide	28044-83-9	n.d.	n.d.	n.d.	n.d.	n.d.	n.d.	n.d.	n.d.	n.d.	n.d.	n.d.	n.d.	n.d.	n.d.	n.d.	n.d.	n.d.	n.d.	n.d.	n.d.	n.d.	n.d.	n.d.	n.d.	n.d.	n.d.	n.d.	n.d.	n.d.	n.d.	n.d.	n.d.	n.d.	n.d.	n.d.	n.d.	4.22784	1.29162	1.69067	2.81976
	α-HCH	319-84-6	0.0221918	n.d.	n.d.	n.d.	n.d.	n.d.	n.d.	n.d.	0.0717282	n.d.	n.d.	n.d.	n.d.	n.d.	n.d.	n.d.	n.d.	n.d.	n.d.	n.d.	n.d.	n.d.	0.0328349	n.d.	n.d.	n.d.	n.d.	n.d.	n.d.	n.d.	n.d.	n.d.	n.d.	n.d.	n.d.	n.d.	0.0244741	n.d.	n.d.	n.d.
	β- HCH	319-85-7	0.0178145	n.d.	n.d.	n.d.	n.d.	n.d.	n.d.	n.d.	0.05331	n.d.	n.d.	n.d.	n.d.	n.d.	n.d.	n.d.	n.d.	n.d.	n.d.	n.d.	n.d.	n.d.	n.d.	n.d.	n.d.	n.d.	n.d.	n.d.	n.d.	n.d.	n.d.	n.d.	n.d.	n.d.	n.d.	n.d.	0.12245	n.d.	0.0991557	0.0814012
	γ-HCH	58-89-9	n.d.	n.d.	n.d.	n.d.	n.d.	n.d.	0.0137068	n.d.	0.00709474	n.d.	n.d.	n.d.	n.d.	n.d.	n.d.	0.099695	n.d.	n.d.	n.d.	n.d.	n.d.	n.d.	0.00486539	n.d.	n.d.	n.d.	n.d.	n.d.	n.d.	n.d.	n.d.	n.d.	n.d.	n.d.	n.d.	n.d.	0.00928414	n.d.	0.0971072	0.00648357
	δ-HCH	319-86-8	n.d.	n.d.	n.d.	n.d.	n.d.	n.d.	n.d.	n.d.	n.d.	n.d.	n.d.	n.d.	n.d.	n.d.	n.d.	0.0676146	n.d.	n.d.	n.d.	n.d.	n.d.	n.d.	n.d.	n.d.	n.d.	n.d.	n.d.	n.d.	n.d.	n.d.	n.d.	n.d.	n.d.	n.d.	n.d.	n.d.	n.d.	n.d.	0.196291	n.d.
*	BDE-47	5436-43-1	0.0160697	n.d.	0.0339878	n.d.	n.d.	n.d.	n.d.	n.d.	n.d.	n.d.	n.d.	n.d.	n.d.	n.d.	n.d.	n.d.	n.d.	n.d.	0.0496344	0.0908475	0.0250774	n.d.	n.d.	n.d.	n.d.	n.d.	n.d.	n.d.	0.0513978	0.064798	n.d.	0.024616	n.d.	n.d.	n.d.	n.d.	3.87347	0.852912	1.47403	2.81193
*	BDE-99	60348-60-9	n.d.	n.d.	n.d.	n.d.	n.d.	n.d.	n.d.	n.d.	n.d.	n.d.	n.d.	n.d.	n.d.	n.d.	n.d.	n.d.	n.d.	n.d.	n.d.	n.d.	n.d.	n.d.	n.d.	n.d.	n.d.	n.d.	n.d.	n.d.	n.d.	n.d.	n.d.	n.d.	n.d.	n.d.	n.d.	n.d.	0.53249	0.036548	0.189647	0.424054
*	Allethrin	584-79-2	n.d.	n.d.	n.d.	n.d.	n.d.	n.d.	n.d.	n.d.	n.d.	n.d.	n.d.	0.354798	n.d.	n.d.	n.d.	n.d.	n.d.	n.d.	n.d.	0.281302	n.d.	n.d.	n.d.	n.d.	n.d.	n.d.	n.d.	1.01581	n.d.	0.323571	n.d.	0.139228	n.d.	0.374618	n.d.	0.296511	n.d.	n.d.	n.d.	n.d.
*	Bifenthrin	82657-04-3	n.d.	n.d.	n.d.	n.d.	n.d.	0.0220566	n.d.	n.d.	n.d.	n.d.	n.d.	n.d.	n.d.	n.d.	n.d.	n.d.	0.0302098	n.d.	n.d.	n.d.	n.d.	n.d.	0.0714607	n.d.	n.d.	n.d.	n.d.	n.d.	n.d.	n.d.	n.d.	n.d.	n.d.	n.d.	n.d.	n.d.	n.d.	n.d.	n.d.	n.d.
*	Cyhalothrin	91465-08-6	n.d.	n.d.	n.d.	n.d.	n.d.	n.d.	n.d.	n.d.	n.d.	n.d.	n.d.	0.125263	n.d.	n.d.	n.d.	n.d.	n.d.	n.d.	n.d.	0.0563639	n.d.	0.0406535	0.0160551	n.d.	n.d.	n.d.	n.d.	0.112285	n.d.	0.0400394	n.d.	n.d.	n.d.	0.0656981	n.d.	0.0622577	n.d.	n.d.	n.d.	n.d.
*	Etofenprox	80844-07-1	0.0469167	0.520787	n.d.	0.38165	n.d.	2.1851	n.d.	n.d.	n.d.	0.169844	n.d.	n.d.	n.d.	0.529498	n.d.	n.d.	n.d.	n.d.	n.d.	n.d.	n.d.	n.d.	n.d.	12.6877	0.286894	n.d.	n.d.	0.254622	0.0201281	n.d.	n.d.	n.d.	n.d.	n.d.	n.d.	0.0186561	0.318203	0.237093	0.0835777	0.0190178
*	Permethrin	52645-53-1	n.d.	n.d.	n.d.	n.d.	n.d.	n.d.	n.d.	n.d.	n.d.	n.d.	n.d.	n.d.	n.d.	n.d.	n.d.	n.d.	n.d.	n.d.	n.d.	n.d.	n.d.	n.d.	n.d.	n.d.	n.d.	n.d.	n.d.	n.d.	n.d.	n.d.	n.d.	n.d.	n.d.	n.d.	n.d.	n.d.	0.148293	n.d.	n.d.	n.d.
*	Prallethrin	23031-36-9	n.d.	n.d.	n.d.	n.d.	n.d.	n.d.	n.d.	n.d.	n.d.	n.d.	n.d.	0.991762	n.d.	n.d.	n.d.	n.d.	n.d.	1.18894	n.d.	n.d.	n.d.	n.d.	n.d.	n.d.	n.d.	n.d.	n.d.	n.d.	n.d.	n.d.	n.d.	n.d.	n.d.	n.d.	n.d.	n.d.	n.d.	n.d.	n.d.	n.d.
*	Transfluthrin	118712-89-3	n.d.	n.d.	n.d.	n.d.	n.d.	n.d.	n.d.	n.d.	n.d.	n.d.	n.d.	n.d.	n.d.	0.325622	n.d.	n.d.	n.d.	n.d.	n.d.	n.d.	n.d.	n.d.	n.d.	n.d.	n.d.	n.d.	n.d.	n.d.	n.d.	n.d.	n.d.	n.d.	n.d.	n.d.	n.d.	n.d.	0.0939279	0.015808	0.0308577	n.d.
	Hexachlorobenzene	118-74-1	n.d.	0.428397	0.467083	0.222186	n.d.	n.d.	n.d.	n.d.	0.764581	0.364371	0.380429	n.d.	n.d.	n.d.	n.d.	n.d.	0.386353	n.d.	0.210326	n.d.	0.421108	n.d.	n.d.	n.d.	n.d.	n.d.	n.d.	n.d.	n.d.	n.d.	n.d.	n.d.	n.d.	n.d.	n.d.	n.d.	2.51976	0.88223	1.22439	1.90566
	Pentachlorobenzene	608-93-5	n.d.	n.d.	n.d.	n.d.	n.d.	n.d.	n.d.	n.d.	n.d.	n.d.	n.d.	0.292229	n.d.	n.d.	n.d.	n.d.	n.d.	0.228418	n.d.	0.221569	n.d.	0.164833	n.d.	n.d.	n.d.	n.d.	n.d.	n.d.	n.d.	n.d.	n.d.	n.d.	n.d.	n.d.	n.d.	n.d.	n.d.	n.d.	0.406627	n.d.
*	Galaxolide	1222-05-5	2.46908	0.359139	0.448593	0.517867	n.d.	0.0780273	n.d.	0.0441238	0.161529	0.427605	0.186495	0.18721	0.155652	0.219389	n.d.	n.d.	0.920994	0.505897	n.d.	0.776921	0.36884	0.0735086	n.d.	0.447546	n.d.	n.d.	0.124739	n.d.	0.109635	0.162987	n.d.	0.419742	0.247431	0.00880781	0.242479	n.d.	n.d.	n.d.	5.24793	n.d.
*	Tonalide	21145-77-7	0.078164	n.d.	n.d.	n.d.	n.d.	n.d.	n.d.	n.d.	0.0677009	0.00362317	n.d.	n.d.	0.0366952	n.d.	n.d.	n.d.	0.0340414	n.d.	n.d.	0.0182697	0.0518349	n.d.	n.d.	n.d.	n.d.	n.d.	n.d.	n.d.	0.0296395	0.0127682	n.d.	0.14833	0.0341859	n.d.	0.105894	n.d.	0.0242269	n.d.	0.723047	n.d.
*	2-Acetonaphthone	93-08-3	n.d.	n.d.	0.0305198	0.00466919	n.d.	0.0122149	n.d.	0.0364581	n.d.	0.0161399	0.0451195	0.00717916	n.d.	n.d.	n.d.	n.d.	n.d.	0.00269693	n.d.	0.00649847	0.00365904	0.000798588	0.00741797	0.00439781	0.00738191	0.00680229	n.d.	0.00158411	0.00168755	0.00115557	n.d.	0.018707	0.00854429	0.00394145	0.0102164	n.d.	0.0117133	0.00102713	0.0806562	0.00851373
*	Benzyl benzoate	120-51-4	0.962986	n.d.	n.d.	n.d.	n.d.	n.d.	n.d.	n.d.	n.d.	n.d.	n.d.	n.d.	0.106799	0.0208478	n.d.	n.d.	n.d.	0.050275	n.d.	n.d.	n.d.	0.0307136	0.0686184	n.d.	0.0310608	0.138122	n.d.	0.0288279	n.d.	n.d.	n.d.	0.302786	n.d.	n.d.	n.d.	0.030227	0.0954407	n.d.	1.80666	0.00254649
*	p-Benzyldiphenyl	613-42-3	0.0323293	0.0107893	0.013151	n.d.	n.d.	n.d.	n.d.	n.d.	n.d.	n.d.	0.00530921	n.d.	n.d.	n.d.	n.d.	0.0291405	n.d.	n.d.	n.d.	n.d.	n.d.	n.d.	n.d.	n.d.	n.d.	n.d.	n.d.	n.d.	n.d.	n.d.	n.d.	n.d.	n.d.	n.d.	n.d.	n.d.	n.d.	n.d.	0.0947862	0.00782303
*	Benzyl-2-naphthylether	613-62-7	n.d.	0.0126046	1.31186	0.0657105	n.d.	0.0536702	0.0349978	0.0185865	n.d.	n.d.	0.422187	0.0707166	2.20335	n.d.	0.0106879	n.d.	2.88816	0.145278	n.d.	0.142841	10.8002	0.0866868	n.d.	0.561782	0.0502658	17.2014	n.d.	0.295811	n.d.	n.d.	n.d.	0.0970989	n.d.	0.215687	23.3553	0.0541446	2.59313	n.d.	n.d.	1.77347
*	Bis(4-chlorophenyl)sulfone	80-07-9	0.146408	n.d.	0.0955112	0.779988	n.d.	n.d.	n.d.	2.70198	0.35287	1.10211	0.206644	n.d.	n.d.	n.d.	n.d.	n.d.	n.d.	1.63691	n.d.	0.0660069	n.d.	0.733634	n.d.	0.124394	n.d.	n.d.	n.d.	1.4607	n.d.	n.d.	n.d.	0.465992	n.d.	0.00324986	n.d.	0.585391	0.113807	0.0830662	0.0690469	0.0981665
*	Dibutylhydroxytoluene	128-37-0	n.d.	0.758705	n.d.	4.26761	n.d.	3.23844	n.d.	n.d.	n.d.	3.68606	n.d.	n.d.	n.d.	n.d.	n.d.	n.d.	n.d.	n.d.	n.d.	n.d.	n.d.	n.d.	4.07881	n.d.	5.62408	0.650811	n.d.	n.d.	n.d.	n.d.	n.d.	n.d.	n.d.	n.d.	n.d.	n.d.	10.442	n.d.	11.2693	0.526892
*	2,6-Diisopropylnaphthalene	24157-81-1	n.d.	0.476395	n.d.	0.320011	0.26409	0.230097	0.184309	n.d.	0.278144	n.d.	n.d.	0.0935658	0.121822	n.d.	0.316825	0.467767	0.210238	0.0599483	0.128588	n.d.	0.0645673	n.d.	n.d.	n.d.	0.0640521	n.d.	0.118004	n.d.	0.0278728	0.0155595	n.d.	0.380561	0.413784	0.0178022	0.153204	n.d.	n.d.	n.d.	n.d.	n.d.
*	DMPA	24650-42-8	n.d.	n.d.	0.0997188	0.21919	n.d.	0.210705	n.d.	0.220751	n.d.	n.d.	0.0789761	0.0239824	n.d.	n.d.	n.d.	n.d.	0.0668906	0.00499888	0.105132	0.0258305	0.0841453	n.d.	0.234301	n.d.	n.d.	0.194573	0.0506965	n.d.	0.0449922	0.0281585	0.0186943	0.123232	0.0711474	0.0173103	0.114755	n.d.	0.0691421	0.0119395	0.0931248	0.0679521
*	Diphenyl sulfone	127-63-9	0.0118917	0.0105468	n.d.	0.012766	0.104366	0.0407622	0.00235617	0.581595	0.0664949	0.0514436	0.0188384	0.00899518	0.0281848	n.d.	0.000793723	n.d.	n.d.	n.d.	n.d.	0.0083275	n.d.	n.d.	n.d.	n.d.	n.d.	0.0124578	n.d.	n.d.	0.0483196	n.d.	n.d.	n.d.	0.082848	n.d.	0.0721875	n.d.	0.00543505	n.d.	0.0573232	0.00197667
*	Diphenylmethane	101-81-5	n.d.	0.0101548	0.00806766	0.0133714	0.0170318	0.02029	0.0358405	0.0234294	0.156207	0.0128472	0.0271831	n.d.	0.0206179	n.d.	0.0343959	0.0386851	n.d.	0.0095063	0.00294859	0.00594877	0.00430132	0.0163612	0.0237391	n.d.	n.d.	0.0165916	0.00571116	0.0334853	0.00256982	n.d.	0.00372633	0.0706842	0.000390503	n.d.	0.00219551	n.d.	0.053288	n.d.	0.247201	0.0111272
*	2,6-di-tert-Butylphenol	128-39-2	n.d.	n.d.	n.d.	n.d.	n.d.	0.231755	0.0716249	0.382894	0.193662	n.d.	n.d.	n.d.	n.d.	n.d.	n.d.	n.d.	n.d.	n.d.	n.d.	0.0331529	0.167312	n.d.	0.0182827	n.d.	n.d.	n.d.	n.d.	n.d.	0.0162356	n.d.	n.d.	0.0701824	n.d.	n.d.	n.d.	n.d.	0.0774955	n.d.	2.83907	n.d.
*	Ethylene glycol diphenylether	104-66-5	0.068009	0.0468185	0.559235	0.065346	0.33089	0.0733621	0.919434	1.55862	0.0533866	0.0704201	1.08549	n.d.	0.0287013	n.d.	n.d.	n.d.	n.d.	n.d.	n.d.	n.d.	n.d.	n.d.	0.116282	n.d.	1.00696	2.28957	0.39321	n.d.	n.d.	n.d.	n.d.	0.0856977	n.d.	n.d.	n.d.	n.d.	132.619	0.0962722	n.d.	3.44077
*	Homosalate	118-56-9	0.676044	n.d.	n.d.	0.041102	n.d.	0.0386127	0.697545	n.d.	0.208067	n.d.	n.d.	0.321691	0.0806894	0.14811	0.0389182	0.054594	0.0702535	0.543401	n.d.	0.402324	0.494156	0.350624	n.d.	0.0654873	n.d.	n.d.	n.d.	0.534397	0.271872	0.498715	n.d.	0.877443	0.719045	0.48004	0.291192	0.120946	n.d.	n.d.	1.59676	0.0477992
*	Enzacamene	36861-47-9	n.d.	0.0485444	n.d.	0.0654826	n.d.	n.d.	n.d.	0.194536	n.d.	0.101329	n.d.	n.d.	n.d.	0.343037	n.d.	n.d.	n.d.	0.0724734	n.d.	0.00804417	n.d.	0.0525117	0.0611343	0.0330597	0.0168863	0.019391	n.d.	0.105438	n.d.	0.0129877	n.d.	0.0707277	n.d.	0.0343328	n.d.	0.0697625	0.122853	0.0234248	0.440065	n.d.
*	trans-alpha-Methylstilbene	103-30-0/833-81-8	0.181548	n.d.	n.d.	n.d.	n.d.	n.d.	0.0766667	n.d.	0.0597979	n.d.	0.0410691	n.d.	0.0705453	n.d.	n.d.	0.11177	n.d.	n.d.	n.d.	n.d.	n.d.	n.d.	n.d.	n.d.	n.d.	n.d.	n.d.	n.d.	n.d.	n.d.	n.d.	0.0950892	n.d.	n.d.	n.d.	n.d.	0.0674201	n.d.	0.127733	1.16746
*	Methyl phenyl sulfone	3112-85-4	n.d.	n.d.	n.d.	n.d.	n.d.	n.d.	n.d.	n.d.	0.165611	n.d.	n.d.	n.d.	0.202037	n.d.	n.d.	n.d.	n.d.	n.d.	n.d.	n.d.	n.d.	n.d.	n.d.	n.d.	n.d.	n.d.	n.d.	n.d.	n.d.	n.d.	n.d.	n.d.	n.d.	n.d.	n.d.	n.d.	n.d.	n.d.	0.26572	n.d.
*	1-Phenylnaphthalene	605-02-7	0.0154336	n.d.	0.00340641	n.d.	n.d.	0.0116339	0.0189085	n.d.	n.d.	0.0116491	n.d.	n.d.	n.d.	n.d.	n.d.	n.d.	n.d.	n.d.	n.d.	n.d.	n.d.	n.d.	0.00968972	2.37058	n.d.	0.0172893	n.d.	n.d.	n.d.	n.d.	n.d.	0.327315	n.d.	n.d.	n.d.	n.d.	0.0168551	n.d.	0.215245	0.38861
*	cis-Stilbene	645-49-8	n.d.	n.d.	n.d.	n.d.	n.d.	n.d.	n.d.	n.d.	n.d.	n.d.	0.00281911	n.d.	n.d.	n.d.	n.d.	0.035022	n.d.	n.d.	n.d.	n.d.	n.d.	n.d.	n.d.	n.d.	n.d.	n.d.	n.d.	n.d.	n.d.	n.d.	n.d.	n.d.	n.d.	n.d.	n.d.	n.d.	n.d.	n.d.	0.394416	0.0935718
*	alpha-Tocopherol acetate	7695-91-2	n.d.	n.d.	n.d.	n.d.	n.d.	n.d.	n.d.	n.d.	n.d.	n.d.	0.127687	n.d.	n.d.	n.d.	n.d.	n.d.	n.d.	n.d.	n.d.	0.593474	n.d.	n.d.	n.d.	0.195237	n.d.	n.d.	0.162542	0.378085	n.d.	0.158058	0.257179	1.30709	n.d.	0.160576	0.164928	0.546873	n.d.	0.444989	n.d.	n.d.

## Sheet: Table S8
Table S8. Iceberg modeling of effect in the (A) AhR-CALUX, (B) AREc32 and (C) PPARγ-bla and (D) cytotoxicity in the AhR-CALUX assay. EC- and IC-values were reported earlier in Reiter et al. 2022.
(A)	AhR-CALUX		Sample name	P.p.1, Liver	P.p.1, Blubber	P.p.2, Liver	P.p.2, Blubber	P.p.3, Liver	P.p.3, Blubber	P.p.3, Brain	P.p.3, Kidney	P.p.4, Liver	P.p.4, Blubber	P.p.4, Brain	P.p.5, Liver	P.p.5, Blubber	P.p.5, Brain	P.p.5, Kidney	P.v.1, Liver	P.v.1, Blubber	P.v.1, Brain	P.v.1, Kidney	O.o.1, Liver	O.o.1, Blubber	O.o.1, Brain	O.o.1, Kidney
			EC10 [kgPDMS/ Lbioassay]	0.027	Vf lipid > 0.27	0.011	Vf lipid > 0.27	0.021	Vf lipid > 0.27	0.068	> IC10	0.0018	> IC10	> IC10	0.0076	> 3.64E-01	> IC10	> IC10	0.037	> IC10	0.018	0.023	0.023	> IC10	0.022	0.015
	AhR-CALUX Reference:	Benzo[a]pyrene (B[a]P)	SE [EC10] [kgPDMS/ Lbioassay]	0.0019		0.00044		0.0014		0.0042		8.2e-05			0.00045				0.0021		0.00062	0.00058	0.0014		0.00056	0.0011
	EC10 (B[a]P) in AhR-CALUX [mol/L]:	3.81e-09	BEQbio [µgB[a]P/ kgPDMS]	36		89		45		14		530			130				26		52	43	42		43	64
			BEQchem [µgB[a]P/kgPDMS]	4.3	1.3	4	0.93	0.25	0.34	0.17	0.19	1	0.72	0.57	0.017	0.038	0.065	0.1	0.25	0.39	0.32	0.26	35	3	9.4	17
			Ratio BEQchem/BEQbio [% explained effect]	0.12		0.045		0.0056		0.012		0.0019			0.00014				0.0093		0.0061	0.006	0.83		0.22	0.26
(B)	AREc32		Sample name	P.p.1, Liver	P.p.1, Blubber	P.p.2, Liver	P.p.2, Blubber	P.p.3, Liver	P.p.3, Blubber	P.p.3, Brain	P.p.3, Kidney	P.p.4, Liver	P.p.4, Blubber	P.p.4, Brain	P.p.5, Liver	P.p.5, Blubber	P.p.5, Brain	P.p.5, Kidney	P.v.1, Liver	P.v.1, Blubber	P.v.1, Brain	P.v.1, Kidney	O.o.1, Liver	O.o.1, Blubber	O.o.1, Brain	O.o.1, Kidney
			ECIR1.5 [kgPDMS/ Lbioassay]	0.017	Vf lipid > 0.27	0.083	Vf lipid > 0.27	0.051	Vf lipid > 0.27	0.045	0.044	0.033	0.0505	0.0284	0.021	0.1	0.102	0.0192	0.0072	0.0145	0.018	0.031	0.027	0.0235	0.023	0.035
	AREc32 Reference:	Benzo[a]pyrene (B[a]P)	SE [ECIR1.5] [kgPDMS/ Lbioassay]	0.00096		0.0086		0.005		0.0024	0.0017	0.0045	0.0028	0.001	0.0013	0.0056	0.0072	0.001	0.00048	0.001	0.00057	0.0008	0.0014	0.00095	0.00082	0.0017
	ECIR1.5 (B[a]P) in AREc32 [mol/L]:	1.65e-07	BEQbio [µgB[a]P/ kgPDMS]	2500		500		820		920	950	1300	820	1500	2000	410	410	2200	5800	2900	2300	1400	1500	1800	1800	1200
			BEQchem [µgB[a]P/kgPDMS]	0.11	0.0034	0.015	0.098	0.0016	0.0054	0.011	0.21	0.059	0.14	0.027	0.017	0	0.0051	0.00098	0.0022	0.0082	0	0.00069	0.43	0.0072	2.4	0.88
			Ratio BEQchem/BEQbio [% explained effect]	4.5e-05		2.9e-05		2e-06		1.2e-05	0.00022	4.7e-05	0.00018	1.8e-05	8.6e-06	0	1.3e-05	4.5e-07	3.8e-07	2.9e-06	0	5.1e-07	0.00029	4.1e-06	0.0013	0.00074
(C)	PPARγ-bla		Sample name	P.p.1, Liver	P.p.1, Blubber	P.p.2, Liver	P.p.2, Blubber	P.p.3, Liver	P.p.3, Blubber	P.p.3, Brain	P.p.3, Kidney	P.p.4, Liver	P.p.4, Blubber	P.p.4, Brain	P.p.5, Liver	P.p.5, Blubber	P.p.5, Brain	P.p.5, Kidney	P.v.1, Liver	P.v.1, Blubber	P.v.1, Brain	P.v.1, Kidney	O.o.1, Liver	O.o.1, Blubber	O.o.1, Brain	O.o.1, Kidney
			EC10 [kgPDMS/ Lbioassay]	0.000607	0.02	0.0015	0.0138	0.00124	0.0139	0.00778	0.00311	0.000805	0.0124	0.00265	0.000888	0.00849	0.00472	0.00111	0.000602	0.00601	0.0034	0.00176	0.0012	0.00561	0.0118	0.00263
	PPARγ-bla Reference:	Rosiglitazone	SE [EC10] [kgPDMS/ Lbioassay]	7.22e-05	0.00229	8.84e-05	0.000815	9.07e-05	0.000767	0.000341	0.000166	7.97e-05	0.000514	0.000153	6.36e-05	0.000614	0.000224	9.64e-05	2.92e-05	0.000474	0.000137	7.34e-05	0.000125	0.000457	0.00209	0.000216
	EC10 (Rosiglitazone) in PPARγ-bla [mol/L]:	3.885e-10	BEQbio [µgRosiglitazone/ kgPDMS]	230	6.9	92	10	110	10	18	45	170	11	52	160	16	29	120	230	23	41	79	120	25	12	53
			BEQchem [µgRosiglitazone/ kgPDMS]	0.00013	3.2e-05	0.00011	4.3e-05	5.9e-06	5.4e-05	0.0002	4.3e-05	6.4e-05	5e-05	7.1e-05	1.5e-05	0	8.3e-05	9e-06	3.6e-06	0	0	1.2e-05	0.0094	0.00047	0.004	0.0065
			Ratio BEQchem/BEQbio [% explained effect]	5.7e-07	4.6e-06	1.2e-06	4.3e-06	5.3e-08	5.4e-06	1.1e-05	9.6e-07	3.7e-07	4.4e-06	1.4e-06	9.5e-08	0	2.8e-06	7.2e-08	1.6e-08	0	0	1.5e-07	8.1e-05	1.9e-05	0.00034	0.00012
(D)	AhR-CALUX		Sample name	P.p.1, Liver	P.p.1, Blubber	P.p.2, Liver	P.p.2, Blubber	P.p.3, Liver	P.p.3, Blubber	P.p.3, Brain	P.p.3, Kidney	P.p.4, Liver	P.p.4, Blubber	P.p.4, Brain	P.p.5, Liver	P.p.5, Blubber	P.p.5, Brain	P.p.5, Kidney	P.v.1, Liver	P.v.1, Blubber	P.v.1, Brain	P.v.1, Kidney	O.o.1, Liver	O.o.1, Blubber	O.o.1, Brain	O.o.1, Kidney
			IC10 [kgPDMS/ Lbioassay]	0.13	> 3.93E-01	0.0188	> 2.94E-01	0.0613	> 3.19E-01	> 1.21E-01	0.00992	0.0102	0.227	0.0238	0.0395	> 3.64E-01	0.0551	0.0336	0.0553	0.108	0.036	0.0469	0.0878	0.152	0.0586	0.0158
			SE [IC10] [kgPDMS/ Lbioassay]	0.0204		0.00185		0.015			0.00085	0.0011	0.0836	0.00179	0.00522		0.00437	0.00308	0.00856	0.00905	0.00333	0.0057	0.0164	0.0173	0.0101	0.00156
			TUbio [Lbioassay/ kgPDMS]	7.7		53		16			100	98	4.4	42	25		18	30	18	9.3	28	21	11	6.6	17	63
			TUchem [Lbioassay/ kgPDMS]	0.23		0.17		0.025			0.02	0.053	0.069	0.033	0.013		0.0081	0.013	0.019	0.03	0.02	0.019	5.1	0.57	0.98	2
			Ratio TUchem/TUbio [% explained effect]	0.03		0.0032		0.0015			0.0002	0.00054	0.016	0.00077	0.0005		0.00044	0.00044	0.001	0.0032	0.0008	0.0009	0.45	0.087	0.057	0.032
E. B. Reiter, B. I. Escher, U. Siebert and A. Jahnke, Activation of the xenobiotic metabolism and oxidative stress response by mixtures of organic pollutants extracted with in-tissue passive sampling from liver, kidney, brain and blubber of marine mammals, Environ Int, 2022, 165, 107337.
